# Supplementary material for: A mesoporous organosilica grafted Pd catalyst (MOG-Pd) for efficient base free and phosphine free synthesis of tertiary butyl esters via tertiary-butoxycarbonylation of boronic acid derivatives without using carbon monoxide
Source: Royal Society of Chemistry journal article supplement (doi:10.1039/c4gc02443e), 2015-01-01

## Supporting Information

### **Mesoporous Organosilica Grafted Pd Catalyst (MOG-Pd) For Efficient Base Free and Phosphine Free Synthesis of Tertiary Butyl Esters Via tertiary-Butoxycarbonylation Of Boronic Acid Derivatives Without Using Carbon Monoxide**

Kajari Ghosh<sup>a</sup>, Rostam Ali Molla<sup>a</sup>, Md. Asif Iqbal<sup>b</sup>, S. M. Islam<sup>a\*</sup>

<sup>a</sup>Department of Chemistry, University of Kalyani, Kalyani, Nadia, 741235, W.B., India.

<sup>b</sup>Department of Chemistry, IIT Roorkee, Roorkee 247667, Uttarakhand, India

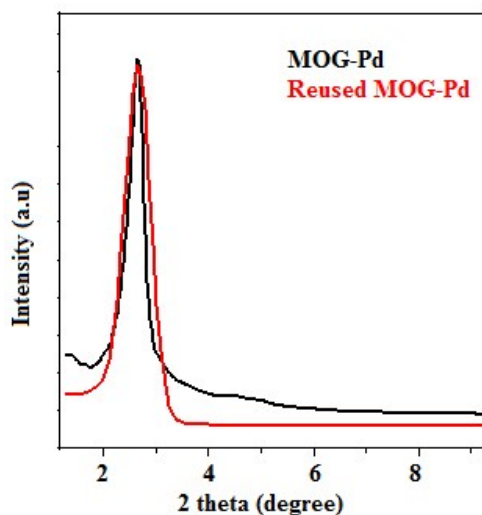

**Fig S1:** XRD pattern of the MOG-Pd and recycled MOG-Pd catalyst

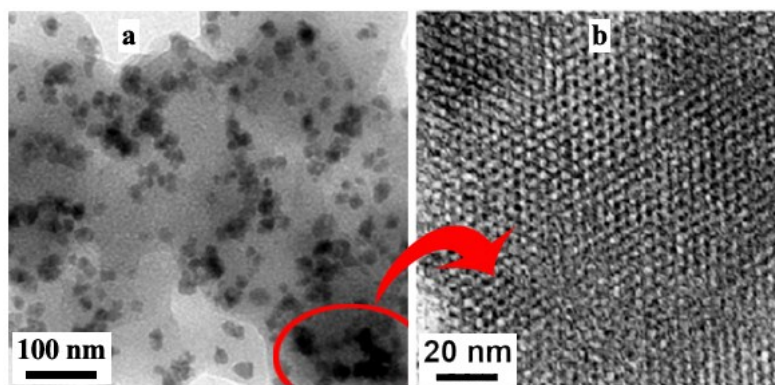

**Fig S2:** HR-TEM images of the recycled MOG-Pd catalyst

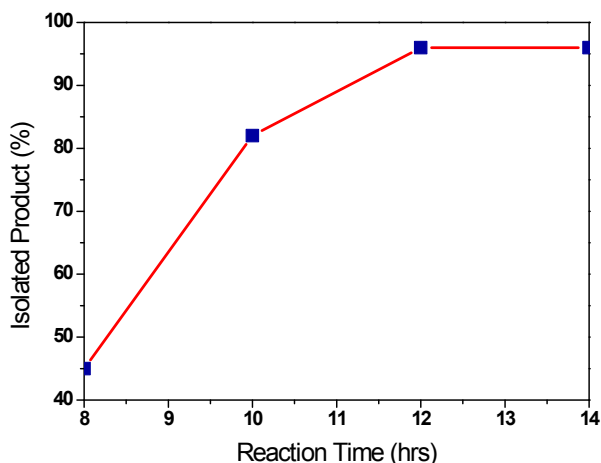

**Fig S3:** Effect of reaction time on MOG-Pd catalyzed tertiary butoxy carbonylation reaction  
 Reaction condition: 1mmol A and 1.8 mmol B of model reaction, 25mg ( $6.44 \times 10^{-3}$  mmol) MOG-Pd(II) catalyst, 10 mol % DABCO, 2 ml dioxane, 80 °C.

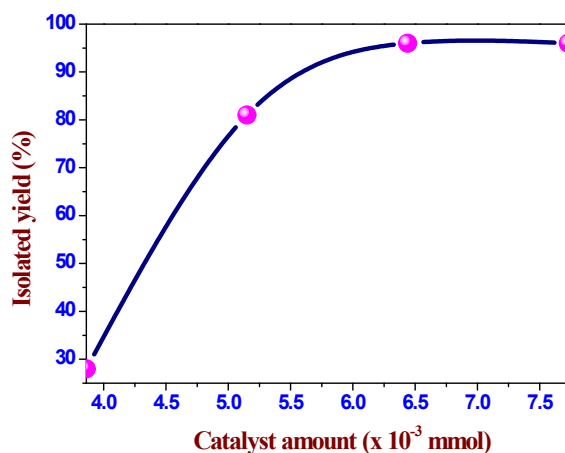

**Fig S4:** Effect of catalyst (MOG-Pd) amount on tertiary butoxy carbonylation reaction  
 Reaction condition: 1mmol A and 1.8 mmol B of model reaction, 10 mol % DABCO, 2 ml dioxane, 80 °C, 12 h.

### Characterization data and copies of NMR Spectra of compounds

#### ***tert*-butyl picolinate (Table 3, entry 1)**

$^1\text{H}$  NMR (400 MHz, 25°C,  $\text{CDCl}_3$ , ppm):  $\delta$  8.72(1H, d,  $J = 4.8$  Hz), 8.02(1H, d,  $J = 7.9$  Hz), 7.78(1H, td,  $J = 7.8, 1.7$  Hz), 7.40(1H, ddd,  $J = 7.8, 4.8, 1.2$  Hz), 1.61(9H, s).  $^{13}\text{C}$  NMR (100 MHz, 25°C,  $\text{CDCl}_3$ , ppm):  $\delta$  164.3, 149.6, 149.6, 136.6, 126.4, 124.7, 82.2, 28.1.

#### ***tert*-butyl nicotinate (Table 3, entry 2)**

$^1\text{H}$  NMR (400 MHz, 25°C,  $\text{CDCl}_3$ , ppm):  $\delta$  9.12(1H, s), 8.69 (1H, d,  $J = 4.6$ Hz), 8.20(1H, d,  $J = 8.1$ Hz), 7.32(1H, dd,  $J = 8.0, 4.6$ Hz), 1.56(9H, s).  $^{13}\text{C}$  NMR (100 MHz, 25°C,  $\text{CDCl}_3$ , ppm):  $\delta$  164.4, 153.0, 150.8, 136.9, 127.4, 123.1, 81.8, 28.1.

#### ***tert*-butyl isonicotinate (Table 3, entry 3)**

$^1\text{H}$  NMR (400 MHz, 25 $^\circ\text{C}$ ,  $\text{CDCl}_3$ , ppm):  $\delta$  8.75(2H, s), 7.80(2H, d,  $J = 5.29$  Hz), 1.61(9H, s).  $^{13}\text{C}$  NMR (100 MHz, 25 $^\circ\text{C}$ ,  $\text{CDCl}_3$ , ppm):  $\delta$  164.2, 150.5, 139.0, 122.9, 82.3, 28.1.

***tert*-butyl 5-cyanonicotinate (Table 3, entry 4)**

$^1\text{H}$  NMR (400 MHz, 25 $^\circ\text{C}$ ,  $\text{CDCl}_3$ , ppm):  $\delta$  9.34(1H, d,  $J = 1.9$  Hz), 8.98(1H, d,  $J = 1.9$  Hz), 8.49(1H, t,  $J = 1.9$  Hz), 1.62(9H, s).  $^{13}\text{C}$  NMR (100 MHz, 25 $^\circ\text{C}$ ,  $\text{CDCl}_3$ , ppm):  $\delta$  162.5, 154.8, 153.7, 140.2, 128.0, 115.8, 109.8, 83.7, 28.1.

***tert*-butyl 6-cyanonicotinate (Table 3, entry 5)**

$^1\text{H}$  NMR (400 MHz, 25 $^\circ\text{C}$ ,  $\text{CDCl}_3$ , ppm):  $\delta$  9.23 (1H, d,  $J = 1.43$  Hz), 8.37(1H, dd,  $J = 7.8$ , 1.9 Hz), 7.78(1H, d,  $J = 7.8$  Hz), 1.62(9H, s).  $^{13}\text{C}$  NMR (100 MHz, 25 $^\circ\text{C}$ ,  $\text{CDCl}_3$ , ppm):  $\delta$  162.7, 151.9, 138.0, 136.5, 130.1, 127.8, 116.7, 83.4, 28.1.

***tert*-butyl 5-ethoxynicotinate (Table 3, entry 6)**

$^1\text{H}$  NMR (400 MHz, 25 $^\circ\text{C}$ ,  $\text{CDCl}_3$ , ppm):  $\delta$  8.71(1H, d,  $J = 1.6$  Hz), 8.38(1H, d,  $J = 2.8$  Hz), 7.66(1H, dd,  $J = 2.8$ , 1.6 Hz), 4.08(2H, q,  $J = 6.8$  Hz), 1.55(9H, s), 1.41(3H, t,  $J = 6.8$  Hz).  $^{13}\text{C}$  NMR (100 MHz, 25 $^\circ\text{C}$ ,  $\text{CDCl}_3$ , ppm):  $\delta$  164.5, 154.6, 142.8, 142.0, 128.1, 120.6, 82.1, 64.1, 28.1, 14.6.

***tert*-butyl 6-(benzyloxy)nicotinate (Table 3, entry 7)**

$^1\text{H}$  NMR (400 MHz, 25 $^\circ\text{C}$ ,  $\text{CDCl}_3$ , ppm):  $\delta$  8.80(1H, d,  $J = 2.0$  Hz), 8.23(1H, dd,  $J = 8.7$ , 2.0 Hz), 7.45(2H, m), 7.36(3H, m), 6.79(1H, d,  $J = 8.7$  Hz), 5.43(2H, s), 1.58(9H, s).  $^{13}\text{C}$  NMR (100 MHz, 25 $^\circ\text{C}$ ,  $\text{CDCl}_3$ , ppm):  $\delta$  166.0, 164.7, 149.8, 139.7, 136.6, 128.6, 128.1, 121.5, 110.8, 81.2, 68.2, 28.1.

**5-*tert*-butyl 2-methyl pyridine-2,5-dicarboxylate (Table 3, entry 8)**

$^1\text{H}$  NMR (400 MHz, 25 $^\circ\text{C}$ ,  $\text{CDCl}_3$ , ppm):  $\delta$  9.25(1H, d,  $J = 1.3$  Hz), 8.38(1H, dd,  $J = 8.1$ , 1.9 Hz), 7.52(1H, d,  $J = 8.1$  Hz), 4.04(3H, s), 1.62(9H, s).  $^{13}\text{C}$  NMR (100 MHz, 25 $^\circ\text{C}$ ,  $\text{CDCl}_3$ , ppm):  $\delta$  165.1, 163.5, 150.8, 150.4, 138.2, 130.4, 124.6, 82.9, 53.2, 28.1.

**3-*tert*-butyl 5-ethyl pyridine-3,5-dicarboxylate (Table 3, entry 9)**

$^1\text{H}$  NMR (400 MHz, 25 $^\circ\text{C}$ ,  $\text{CDCl}_3$ , ppm):  $\delta$  9.32(1H, d,  $J = 2.2$  Hz), 9.29(1H, d,  $J = 2.2$  Hz), 8.79(1H, t,  $J = 2.2$  Hz), 4.43(2H, q,  $J = 7.4$  Hz), 1.61(9H, s), 1.41(3H, t,  $J = 7.4$  Hz).  $^{13}\text{C}$  NMR (100 MHz, 25 $^\circ\text{C}$ ,  $\text{CDCl}_3$ , ppm):  $\delta$  164.6, 163.6, 154.1, 153.7, 137.7, 127.6, 126.1, 82.8, 61.7, 28.1, 14.3.

***tert*-butyl 5-allylnicotinate (Table 3, entry 10)**

$^1\text{H}$  NMR (400 MHz, 25 $^\circ\text{C}$ ,  $\text{CDCl}_3$ , ppm):  $\delta$  9.01(1H, s), 8.58(1H, s), 8.10(1H, s), 5.93(1H, m), 5.13(2H, m), 3.45 (2H, t,  $J = 6.6$  Hz), 1.60 (9H, s).  $^{13}\text{C}$  NMR (100 MHz, 25 $^\circ\text{C}$ ,  $\text{CDCl}_3$ , ppm):  $\delta$  164.3, 152.6, 148.2, 137.5, 135.5, 135.4, 127.8, 117.6, 82.3, 36.9, 28.1.

***tert*-butyl 6-(dimethylamino)nicotinate (Table 3, entry 11)**

$^1\text{H}$  NMR (400 MHz, 25 $^\circ\text{C}$ ,  $\text{CDCl}_3$ , ppm):  $\delta$  8.76(1H, d,  $J = 2.1$  Hz), 7.95(1H, dd,  $J = 8.9$ , 2.1 Hz), 6.44(1H, d,  $J = 8.9$  Hz), 3.15(6H, s), 1.56(9H, s).  $^{13}\text{C}$  NMR (100 MHz, 25 $^\circ\text{C}$ ,  $\text{CDCl}_3$ , ppm):  $\delta$  165.6, 160.7, 151.0, 138.1, 115.3, 104.4, 80.3, 38.1, 28.1.

***tert*-butyl 2-phenylisonicotinate (Table 3, entry 12)**

$^1\text{H}$  NMR (400 MHz, 25 $^\circ\text{C}$ ,  $\text{CDCl}_3$ , ppm):  $\delta$  8.87(1H, d,  $J = 4.6$  Hz), 8.25(1H, s), 8.12(2H, d,  $J = 6.4$  Hz), 7.75(1H, dd,  $J = 4.6$ , 1.7 Hz), 7.52(3H, m), 1.60(9H, s).  $^{13}\text{C}$  NMR (100 MHz,

25°C, CDCl<sub>3</sub>, ppm): δ 163.8, 157.2, 150.7, 139.8, 137.9, 129.6, 129.0, 126.7, 121.1, 118.6, 82.2, 27.7.

***tert*-butyl quinoline-4-carboxylate (Table 3, entry 13)**

<sup>1</sup>H NMR (400 MHz, 25°C, CDCl<sub>3</sub>, ppm): δ 8.99(1H, d, *J* = 4.5 Hz), 8.71(1H, d, *J* = 8.5 Hz), 8.16(1H, d, *J* = 8.5 Hz), 7.81(1H, d, *J* = 4.5 Hz), 7.76(1H, m), 7.65(1H, m), 1.69(9H, s). <sup>13</sup>C NMR (100 MHz, 25°C, CDCl<sub>3</sub>, ppm): δ 165.8, 149.8, 149.2, 137.1, 136.2, 130.0, 129.6, 127.9, 125.6, 121.8, 83.0, 28.1.

***tert*-butyl 5-cyclopropylnicotinate (Table 3, entry 14)**

<sup>1</sup>H NMR (400 MHz, 25°C, CDCl<sub>3</sub>, ppm): δ 8.90(1H, s), 8.53(1H, s), 7.82(1H, s), 1.92(1H, m), 1.58(9H, s), 1.05(2H, m), 0.8(2H, m). <sup>13</sup>C NMR (100 MHz, 25°C, CDCl<sub>3</sub>, ppm): δ 164.6, 151.3, 147.6, 139.5, 133.5, 127.5, 82.1, 28.1, 12.9, 9.3.

***tert*-butyl 6-cyclopropylnicotinate (Table 3, entry 15)**

<sup>1</sup>H NMR (400 MHz, 25°C, CDCl<sub>3</sub>, ppm): δ 8.99(1H, s), 8.09(1H, m), 7.17(1H, d, *J* = 7.67 Hz), 2.10(1H, m), 1.58(9H, s), 1.10(4H, m). <sup>13</sup>C NMR (100 MHz, 25°C, CDCl<sub>3</sub>, ppm): δ 167.2, 164.6, 150.2, 137.1, 124.6, 120.8, 82.7, 28.1, 17.4, 11.2.

***tert*-butyl 2-methylbenzoate (Table 4, entry 1)**

<sup>1</sup>H NMR (400 MHz, 25°C, CDCl<sub>3</sub>, ppm): δ 7.82(1H, d, *J* = 7.5 Hz), 7.36(1H, t, *J* = 7.5 Hz), 7.22(2H, t, *J* = 7.6 Hz), 2.58(3H, s), 1.60(9H, s). <sup>13</sup>C NMR (100 MHz, 25°C, CDCl<sub>3</sub>, ppm): δ 167.3, 139.2, 131.6, 131.6, 131.4, 130.3, 125.7, 81.1, 28.3, 21.6.

***tert*-butyl 4-methoxybenzoate (Table 4, entry 2)**

<sup>1</sup>H NMR (400 MHz, 25°C, CDCl<sub>3</sub>, ppm): δ 7.94 (2H, d, *J* = 8.7 Hz), 6.88 (2H, d, *J* = 8.6 Hz), 3.82 (3H, s), 1.58 (9H, s). <sup>13</sup>C NMR (100 MHz, 25°C, CDCl<sub>3</sub>, ppm): δ 165.7, 163.0, 131.2, 124.5, 113.3, 80.4, 55.3, 28.3.

***tert*-butyl 3,4-dimethoxybenzoate (Table 4, entry 3)**

<sup>1</sup>H NMR (400 MHz, 25°C, CDCl<sub>3</sub>, ppm): δ 7.60 (1H, dd, *J* = 8.4, 2.0 Hz), 7.50 (1H, d, *J* = 2.0 Hz), 6.84 (1H, d, *J* = 8.4 Hz), 3.90 (s, 6H), 1.57 (9H, s). <sup>13</sup>C NMR (100 MHz, 25°C, CDCl<sub>3</sub>, ppm): δ (ppm) 165.7, 152.5, 148.5, 124.4, 123.2, 111.9, 110.1, 80.6, 55.94, 55.87, 28.3.

***tert*-butyl 2-fluorobenzoate (Table 4, entry 4)**

<sup>1</sup>H NMR (400 MHz, 25°C, CDCl<sub>3</sub>, ppm): δ 7.85(1H, td, *J* = 7.7, 1.8 Hz), 7.46(1H, m), 7.17(1H, td, *J* = 7.6, 1.0 Hz), 7.10(1H, dd, *J* = 10.1, 1.0 Hz), 1.59(9H, s). <sup>13</sup>C NMR (100 MHz, 25°C, CDCl<sub>3</sub>, ppm): δ 162.6, 162.1, 159.5, 132.7, 130.9, 122.6, 119.8, 115.4, 80.8, 27.2.

***tert*-butyl 4-fluorobenzoate (Table 4, entry 5)**

<sup>1</sup>H NMR (400 MHz, 25°C, CDCl<sub>3</sub>, ppm): δ 7.93(2H, m), 7.08(2H, t, *J* = 8.6 Hz), 1.58(9H, s). <sup>13</sup>C NMR (100 MHz, 25°C, CDCl<sub>3</sub>, ppm): δ 166.7, 164.3, 164.8, 131.8, 128.2, 115.2, 81.2, 28.1.

***tert*-butyl 2-chlorobenzoate (Table 4, entry 6)**

<sup>1</sup>H NMR (400 MHz, 25<sup>o</sup>C, CDCl<sub>3</sub>, ppm): δ 7.73(1H, dd, *J* = 7.5, 1.7 Hz), 7.42(1H, dd, *J* = 7.9, 1.5 Hz), 7.36(1H, t, *J* = 7.9, 1.7 Hz), 7.29(1H, td, *J* = 7.5, 1.5 Hz), 1.61(9H, s). <sup>13</sup>C NMR (100 MHz, 25<sup>o</sup>C, CDCl<sub>3</sub>, ppm): δ 165.3, 133.1, 132.2, 131.8, 130.9, 130.8, 126.5, 82.3, 28.2.

***tert*-butyl 4-chlorobenzoate (Table 4, entry 7)**

<sup>1</sup>H NMR (400 MHz, 25<sup>o</sup>C, CDCl<sub>3</sub>, ppm): δ 7.92 (2H, d, *J* = 8.5 Hz), 7.38 (2H, d, *J* = 8.4 Hz), 1.58 (9H, s). <sup>13</sup>C NMR (100 MHz, 25<sup>o</sup>C, CDCl<sub>3</sub>, ppm): δ 164.9, 138.8, 130.9, 130.4, 128.4, 81.5, 28.2.

***tert*-butyl 4-(trifluoromethyl)benzoate (Table 4, entry 8)**

<sup>1</sup>H NMR (400 MHz, 25<sup>o</sup>C, CDCl<sub>3</sub>, ppm): δ 8.10 (2H, d, *J* = 8.1 Hz), 7.67 (2H, d, *J* = 8.0 Hz), 1.61 (9H, s). <sup>13</sup>C NMR (100 MHz, 25<sup>o</sup>C, CDCl<sub>3</sub>, ppm): δ 164.5, 135.3, 133.9, 129.9, 125.2, 123.7, 82.0, 28.2.

***tert*-butyl 4-cyanobenzoate (Table 4, entry 9)**

<sup>1</sup>H NMR (400 MHz, 25<sup>o</sup>C, CDCl<sub>3</sub>, ppm): δ 8.09 (2H, d, *J* = 8.0 Hz), 7.72(2H, d, *J* = 8.1 Hz), 1.60 (9H, s). <sup>13</sup>C NMR (100 MHz, 25<sup>o</sup>C, CDCl<sub>3</sub>, ppm): δ 164.0, 135.8, 132.1, 130.0, 118.1, 115.8, 82.4, 28.2.

***tert*-butyl 4-biphenylbenzoate (Table 4, entry 10)**

<sup>1</sup>H NMR (400 MHz, 25<sup>o</sup>C, CDCl<sub>3</sub>, ppm): δ 8.06 (2H, d, *J* = 8.4 Hz), 7.64 (4H, t, *J* = 7.6 Hz), 7.47 (2H, t, *J* = 7.4 Hz), 7.42-7.37 (1H, m), 1.62 (9H, s). <sup>13</sup>C NMR (100 MHz, 25<sup>o</sup>C, CDCl<sub>3</sub>, ppm): δ 165.8, 145.2, 140.2, 130.8, 130.1, 128.9, 128.1, 127.4, 126.9, 81.0, 28.2.

***tert*-butyl 1-napthoate (Table 4, entry 11)**

<sup>1</sup>H NMR (400 MHz, 25<sup>o</sup>C, CDCl<sub>3</sub>, ppm): δ 8.86 (1H, d, *J* = 8.8 Hz), 8.08 (1H, dd, *J* = 7.4, 1.4 Hz), 7.99 (d, *J* = 8.1 Hz, 1H), 7.87 (d, *J* = 8.4 Hz, 1H), 7.62-7.47 (3H, m), 1.68 (9H, s). <sup>13</sup>C NMR (100 MHz, 25<sup>o</sup>C, CDCl<sub>3</sub>, ppm): δ 167.2, 133.8, 132.6, 131.2, 129.6, 129.4, 128.5, 127.4, 126.1, 125.8, 124.5, 81.5, 28.3.

***tert*-butyl 2-napthoate (Table 4, entry 12)**

<sup>1</sup>H NMR (400 MHz, 25<sup>o</sup>C, CDCl<sub>3</sub>, ppm): δ 8.57 (1H, s), 8.06 (1H, dd, *J* = 8.4, 1.8 Hz), 7.95 (1H, d, *J* = 8.1 Hz), 7.86 (2H, d, *J* = 8.8 Hz), 7.60-7.51 (2H, m), 1.63 (9H, s). <sup>13</sup>C NMR (100 MHz, 25<sup>o</sup>C, CDCl<sub>3</sub>, ppm): δ 166.0, 135.3, 132.5, 130.7, 129.4, 127.9, 127.9, 127.7, 126.6, 125.3, 81.1, 28.2.

***tert*-butyl 2-thiophenoate (Table 4, entry 13)**

<sup>1</sup>H NMR (400 MHz, 25<sup>o</sup>C, CDCl<sub>3</sub>, ppm): δ 7.72 (1H, d, *J* = 4.0 Hz), 7.49 (1H, d, *J* = 5.2 Hz), 7.07 (1H, t, *J* = 4.4 Hz), 1.58 (9H, s). <sup>13</sup>C NMR (100 MHz, 25<sup>o</sup>C, CDCl<sub>3</sub>, ppm): δ 161.6, 135.9, 132.7, 131.6, 127.6, 81.7, 28.3.

Table 3, entry 1

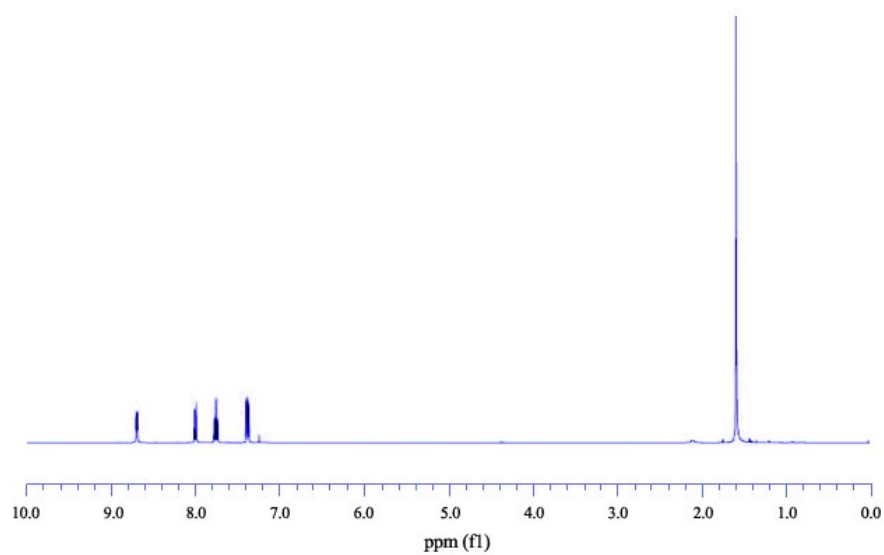

Table 3, entry 2

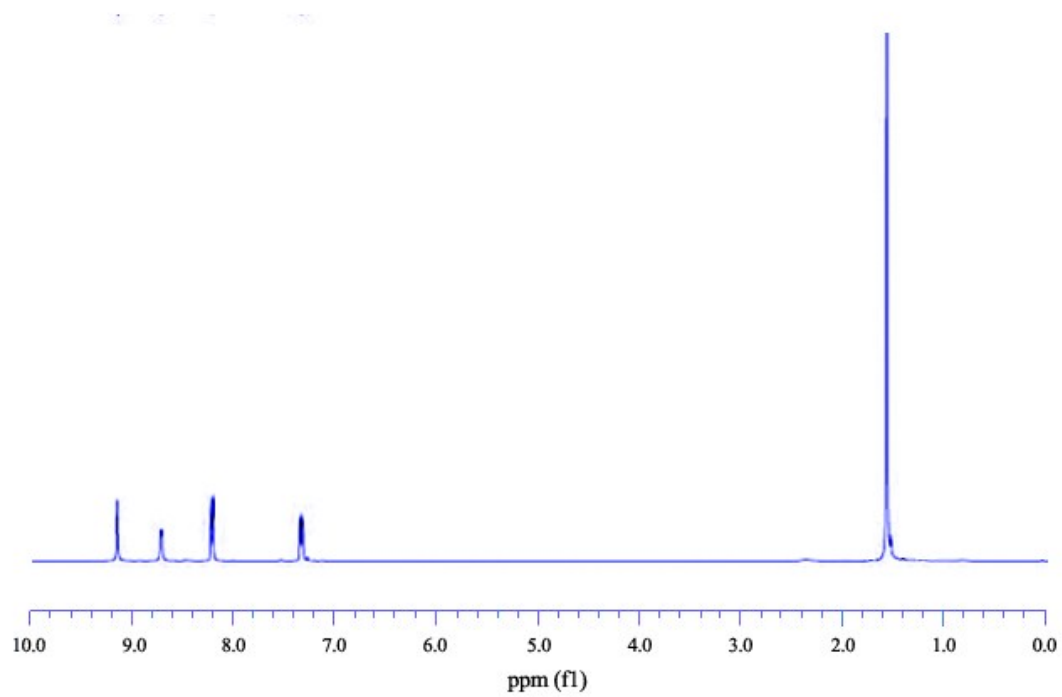

Table 3, entry 3

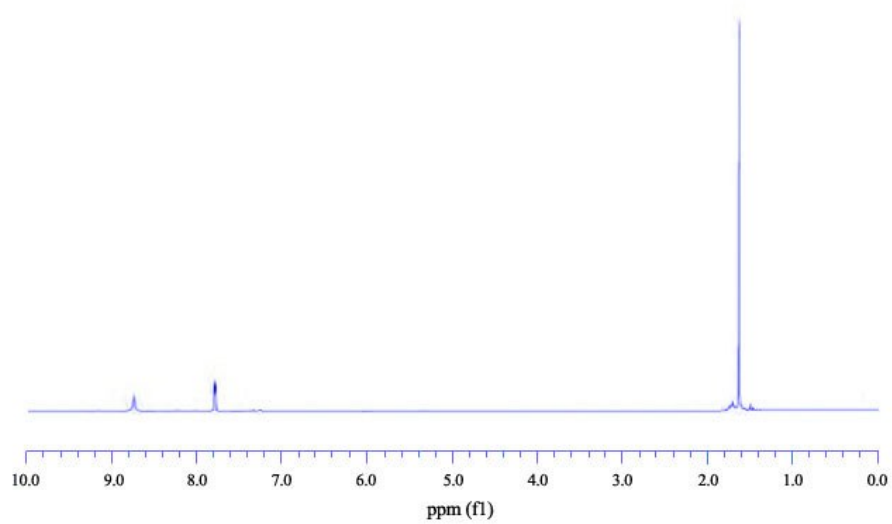

Table 3, entry 4

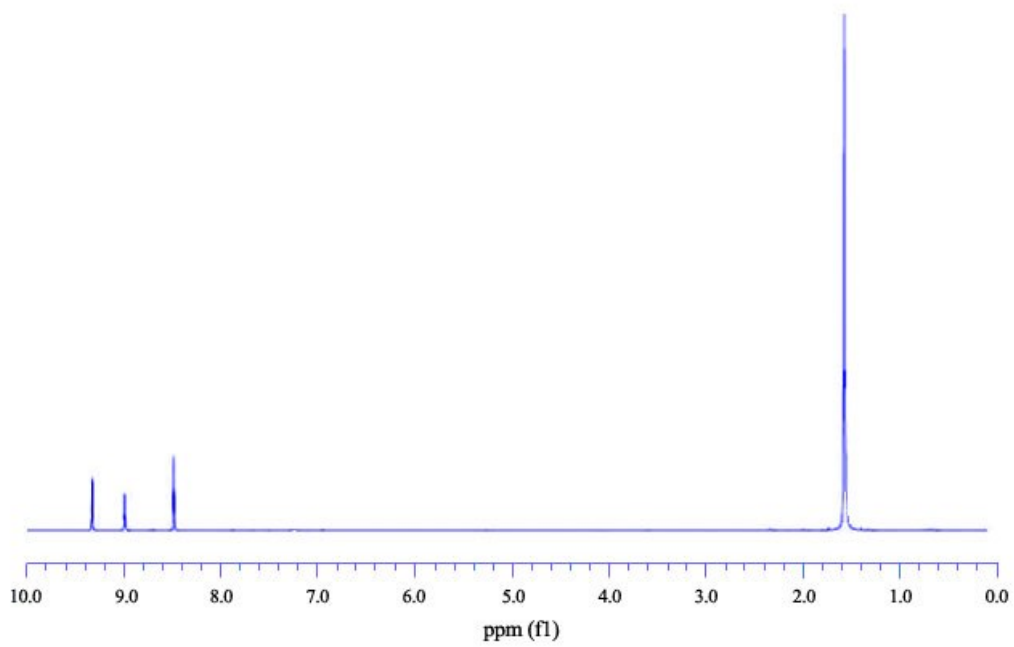

Table 3, entry 5

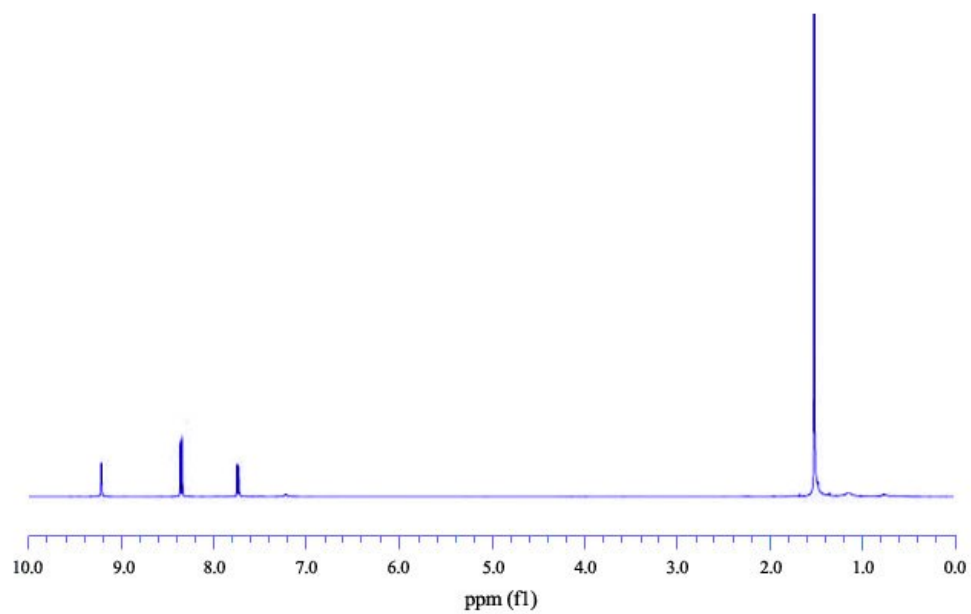

Table 3, entry 6

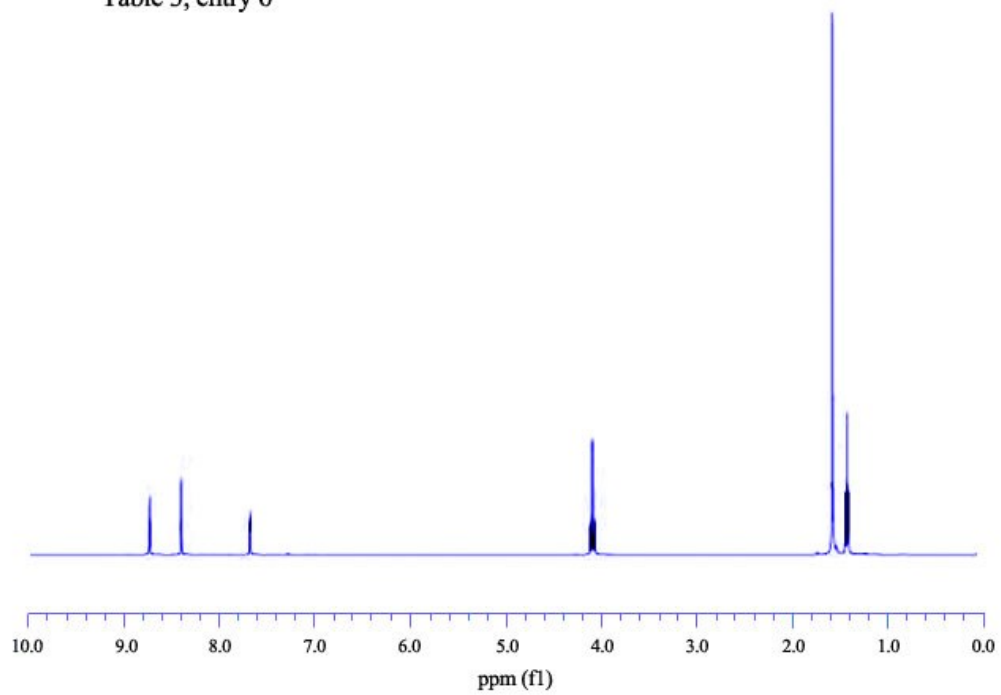



Table 3, entry 7

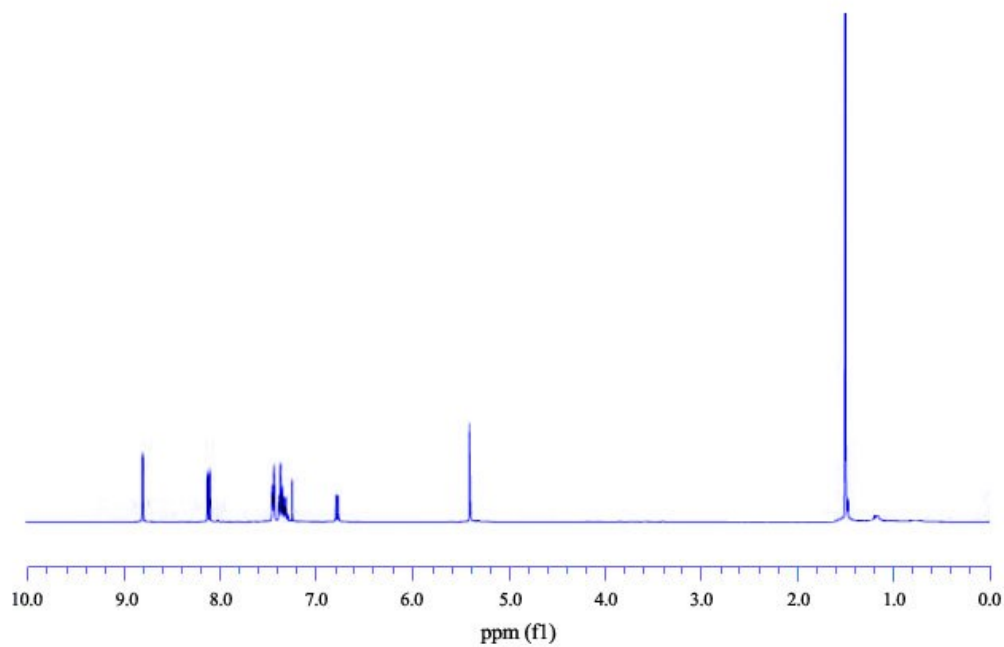

Table 3, entry 8

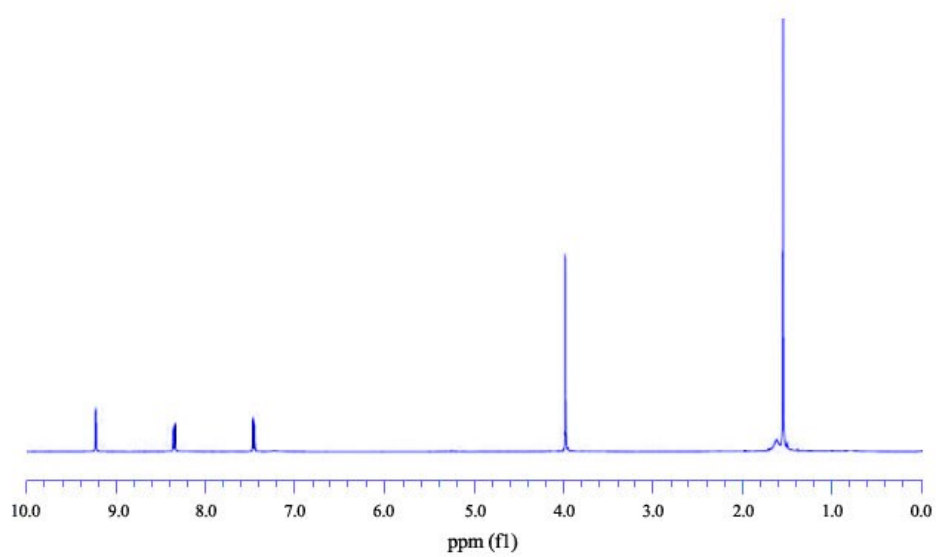

Table 3, entry 9

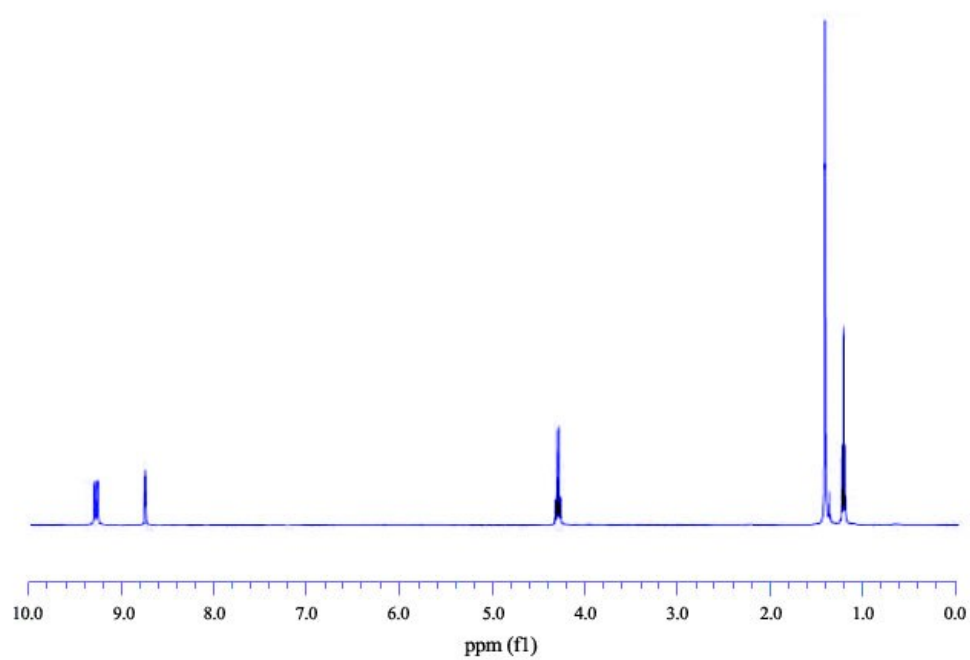

Table 3, entry 10

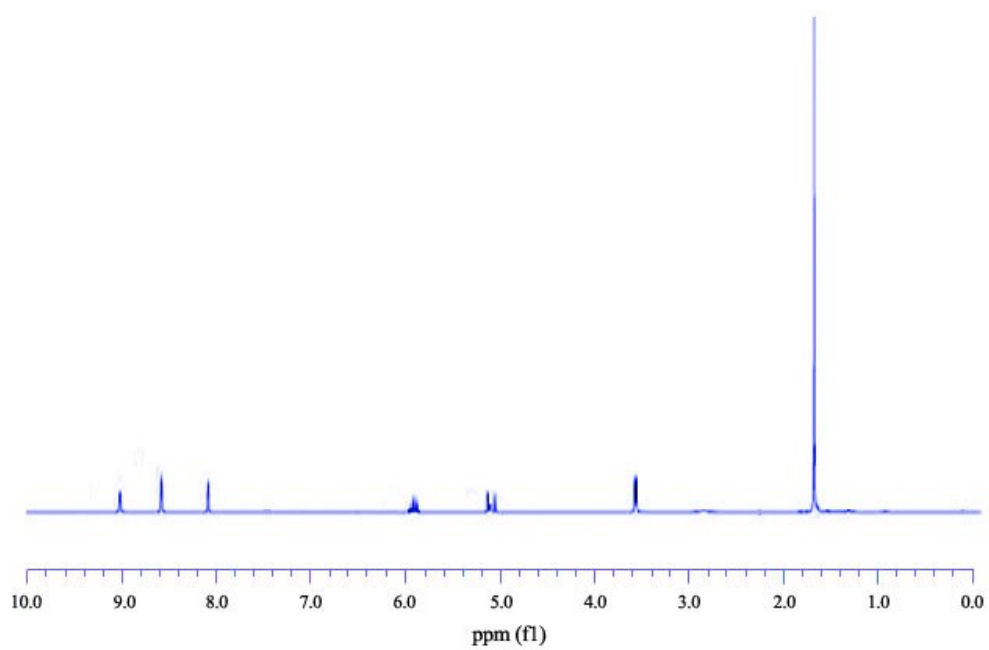

Table 3, entry 11

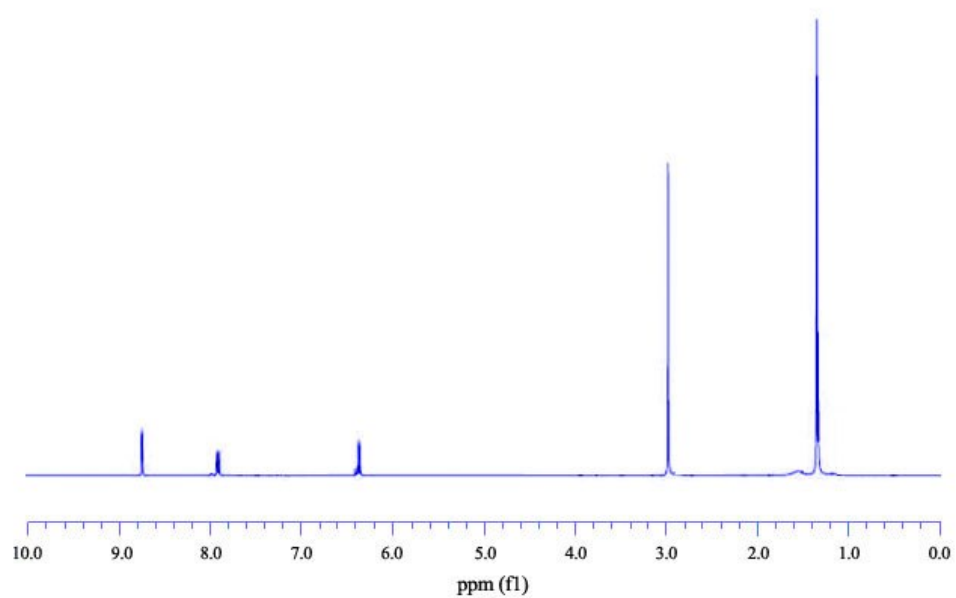

Table 3, entry 12

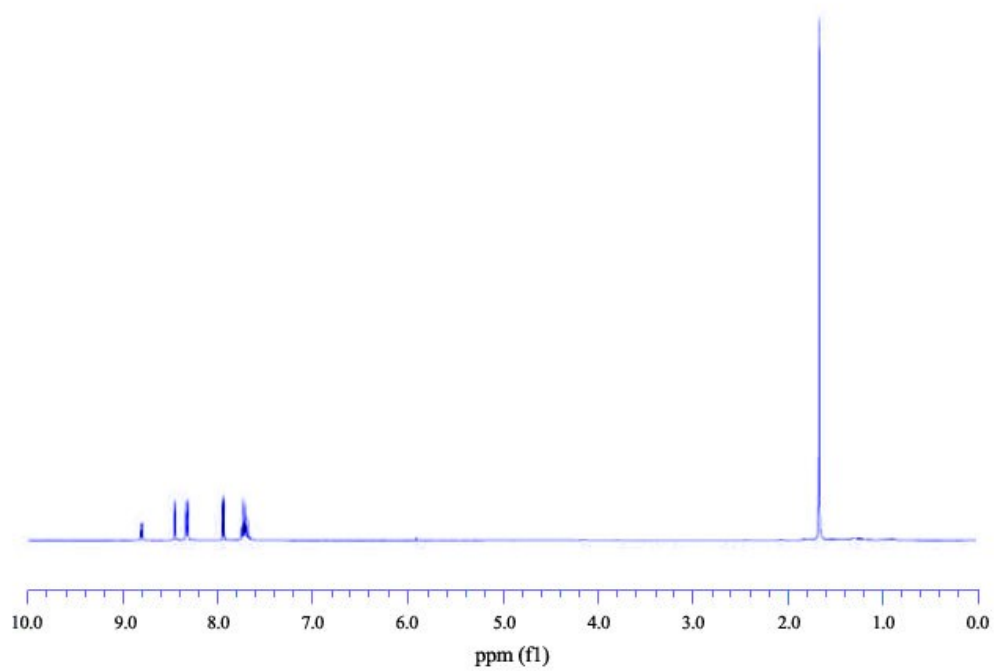

Table 3, entry 13

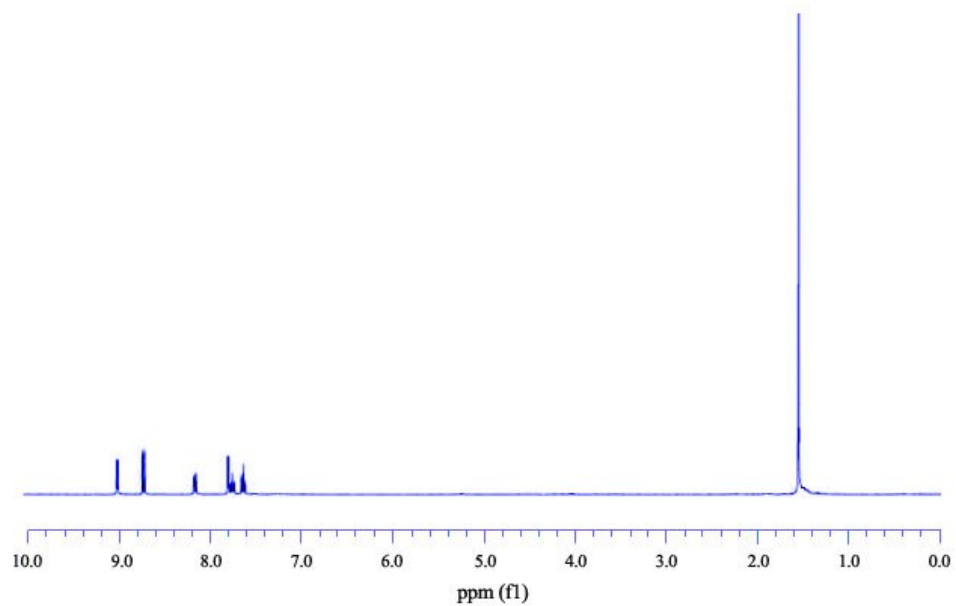

Table 3, entry 14

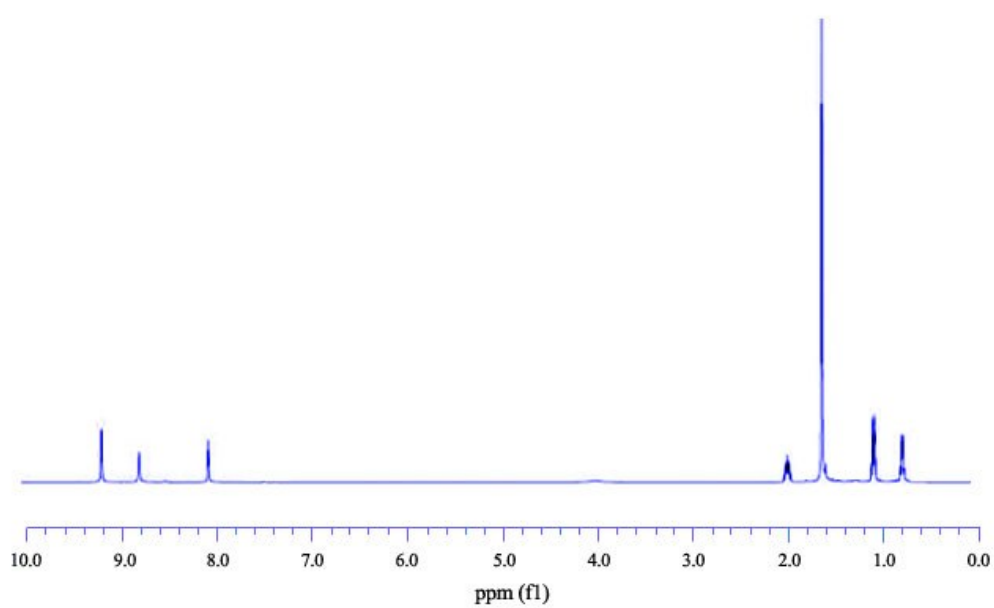

Table 3, entry 15

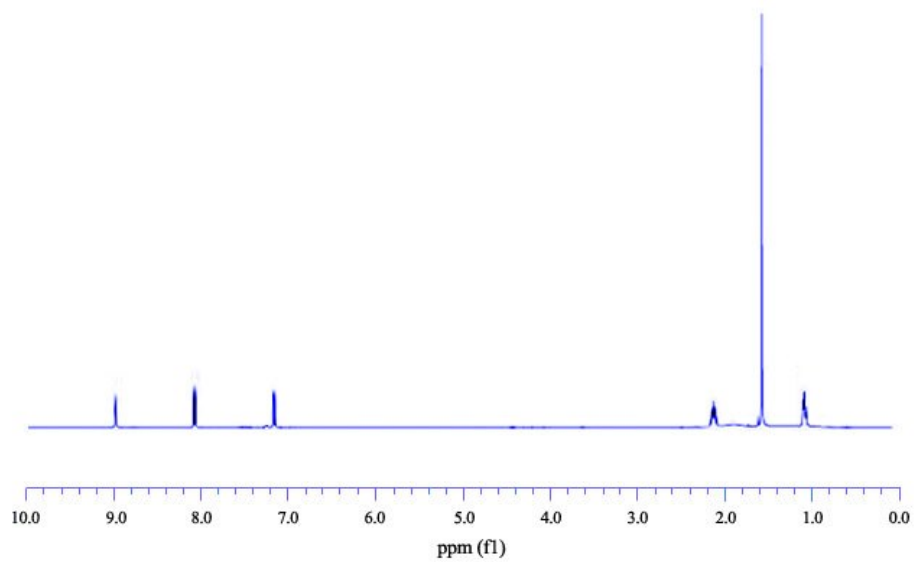

Table 4, entry 1

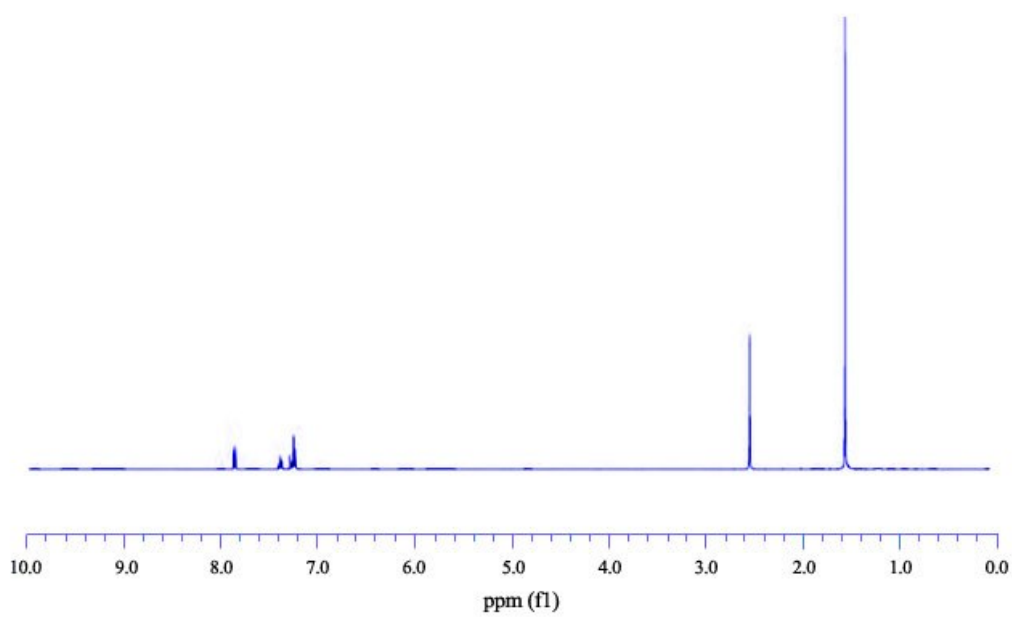

Table 4, entry 2

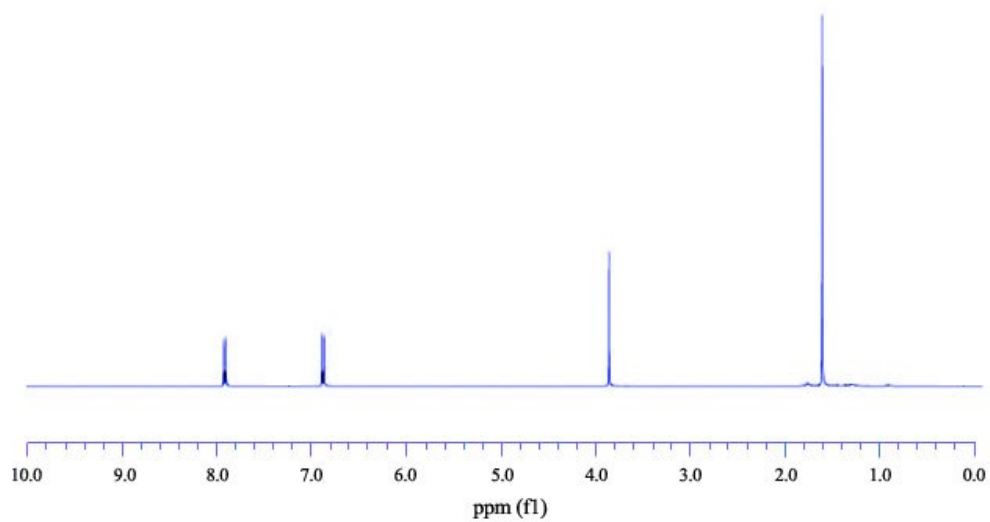

Table 4, entry 3

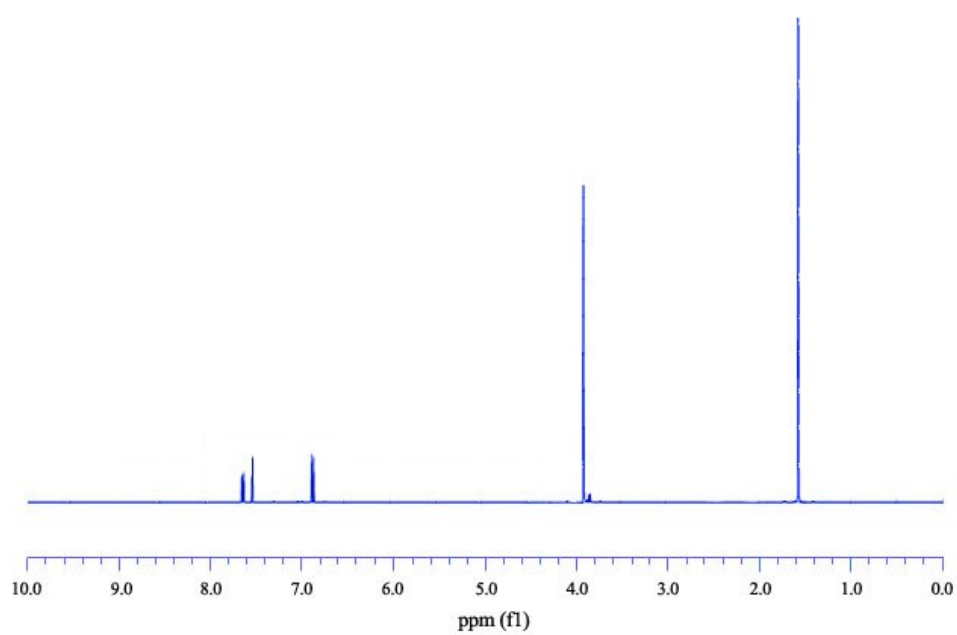

Table 4, entry 4

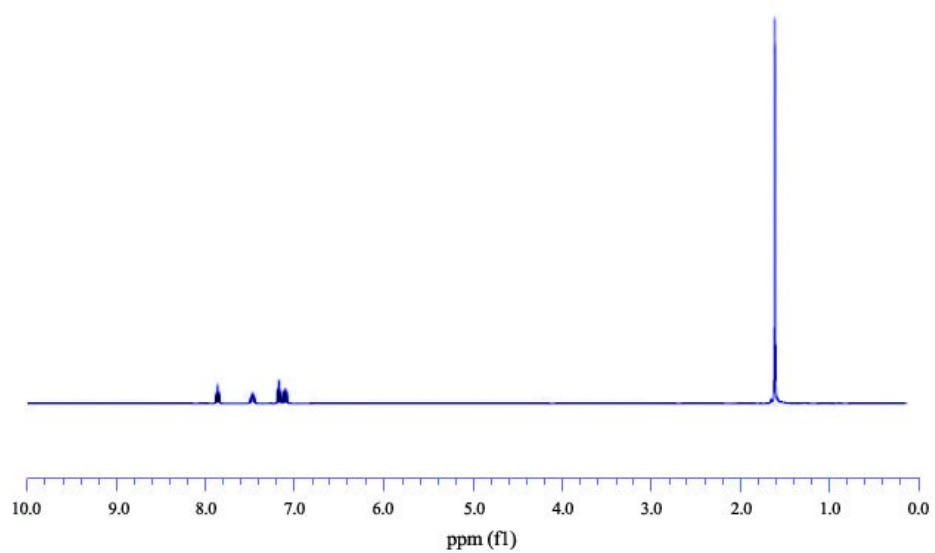

Table 4, entry 5

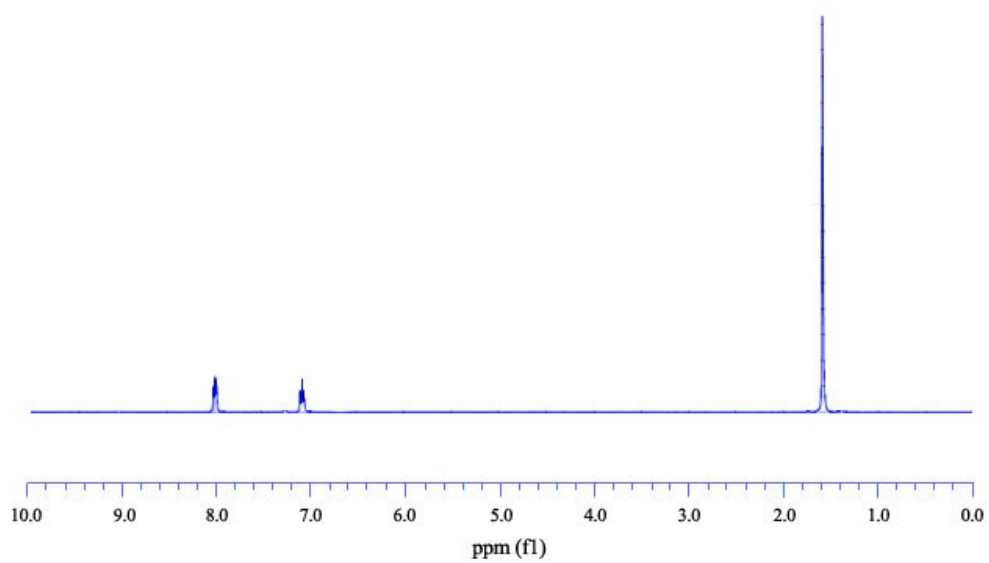

Table 4, entry 6

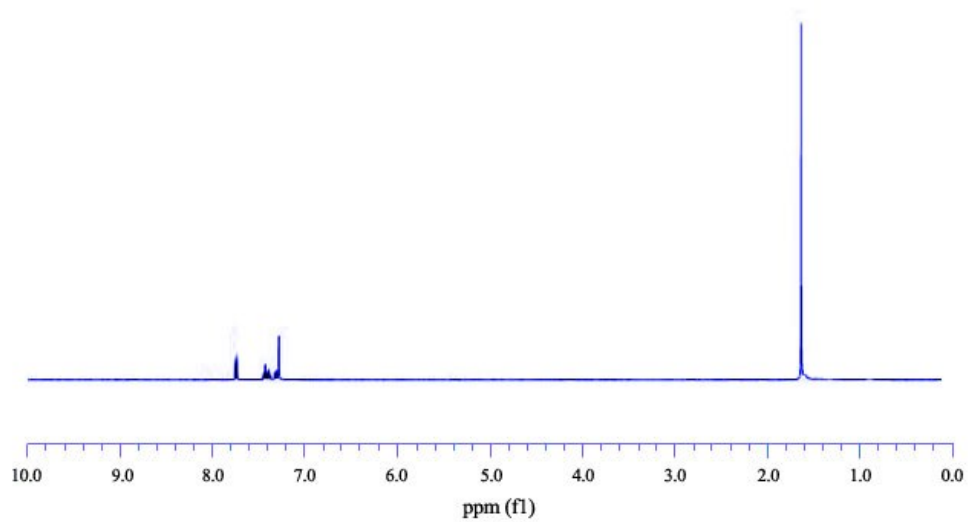

Table 4, entry 7

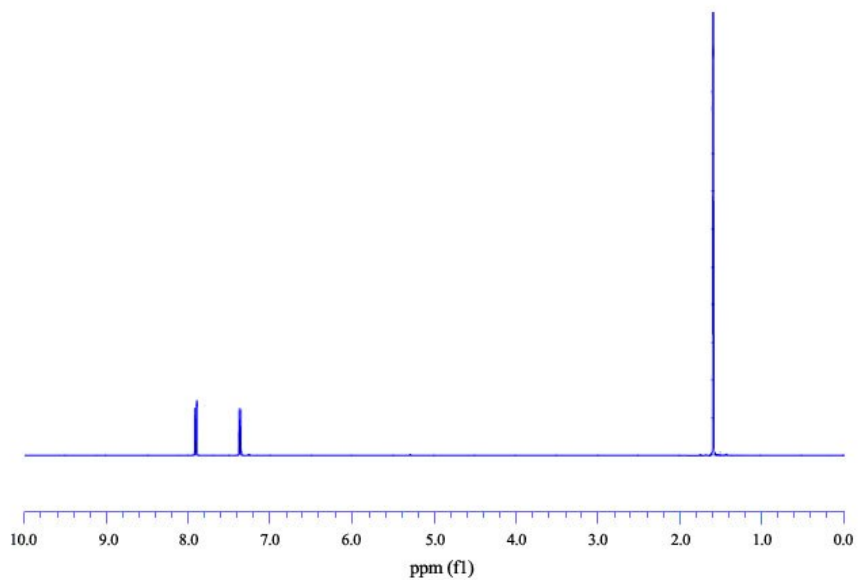



Table 4, entry 8

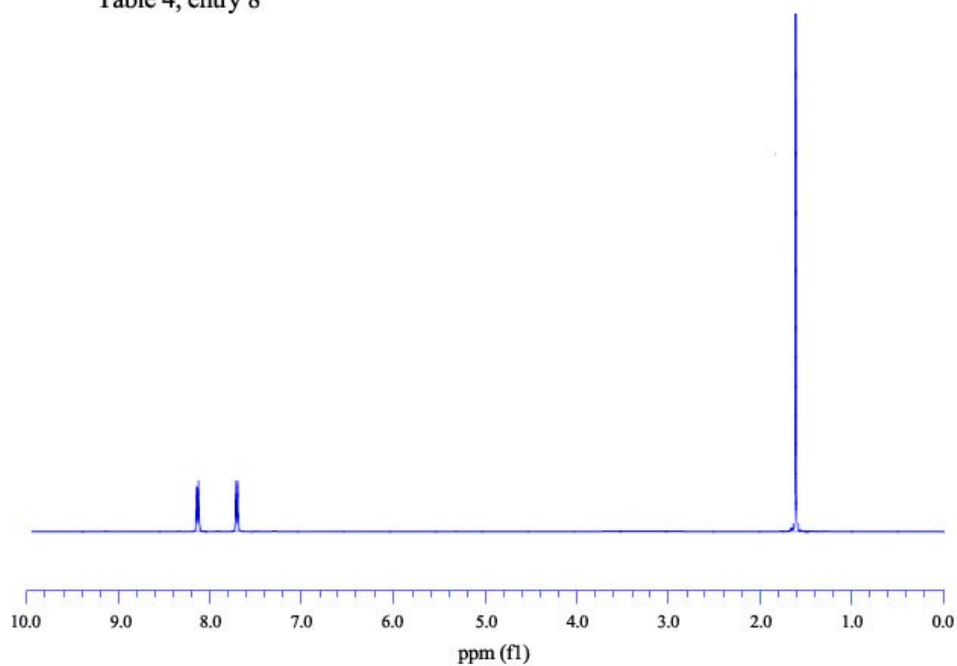

Table 4, entry 9

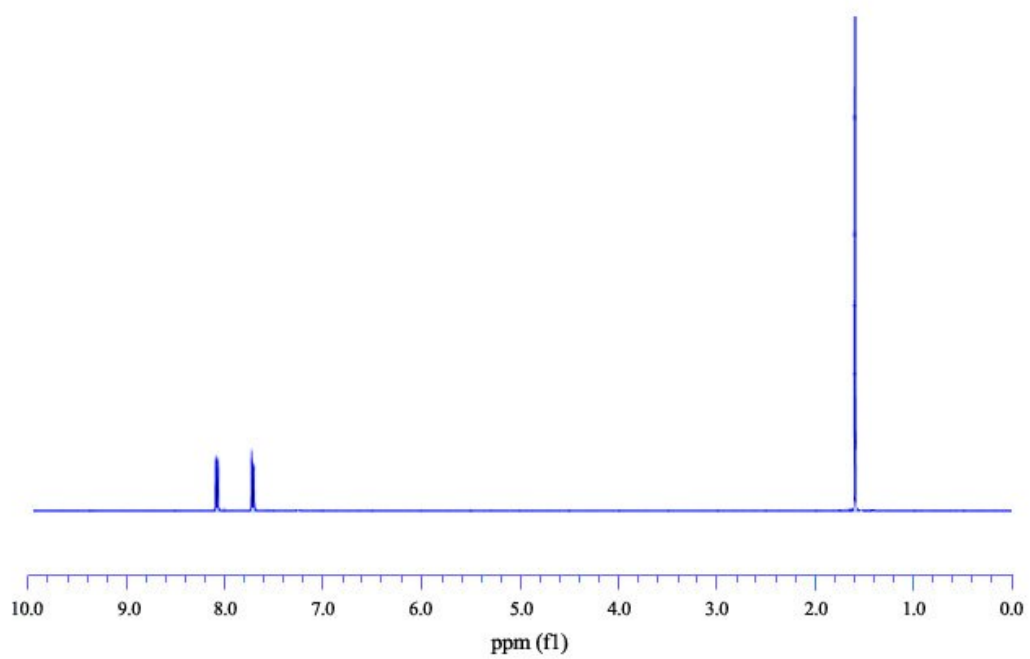

Table 4, entry 10

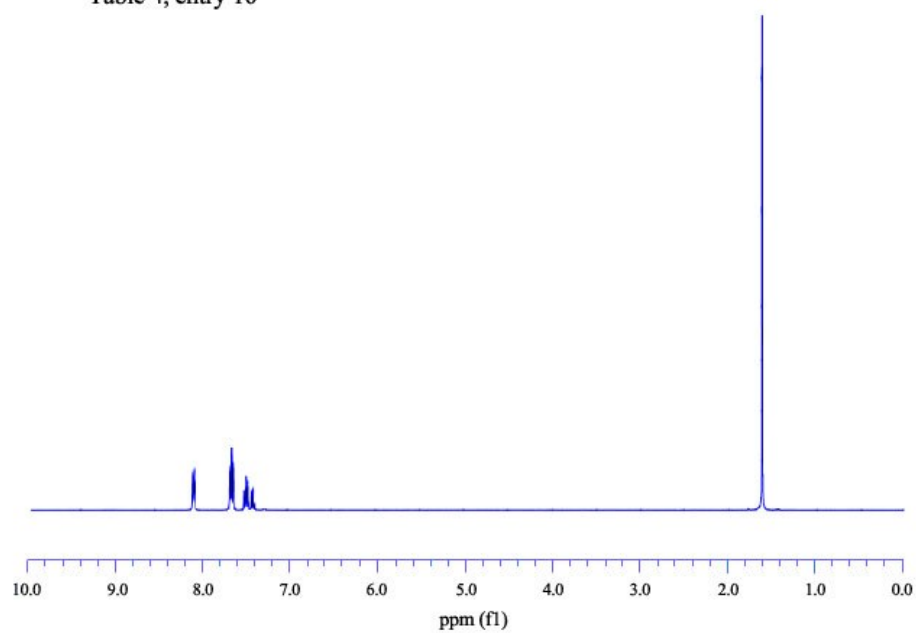

Table 4, entry 11

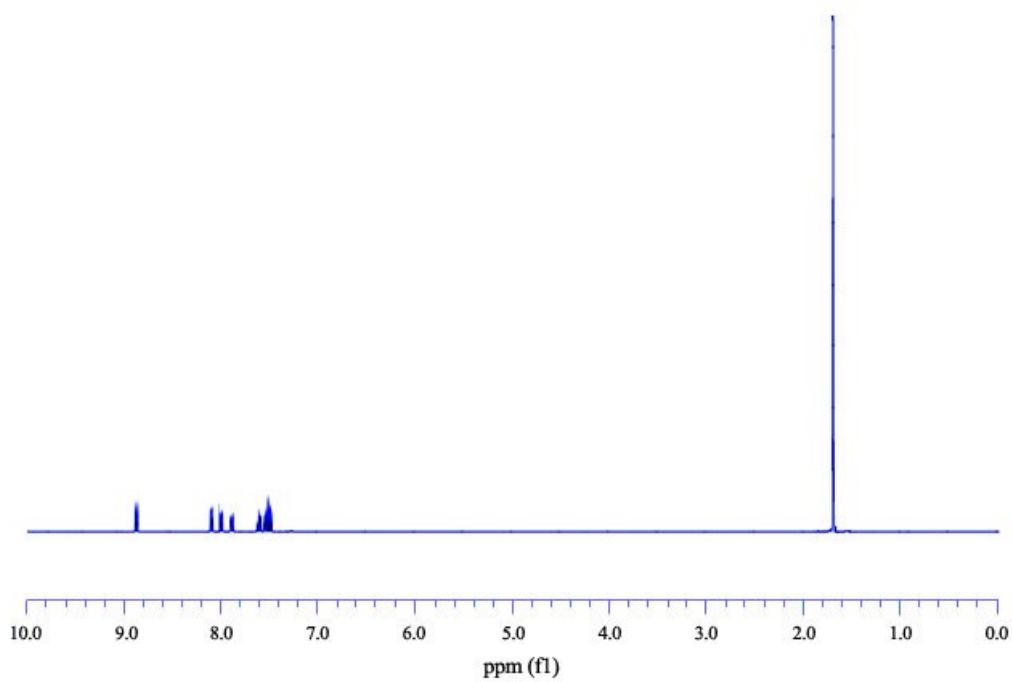

Table 4, entry 12

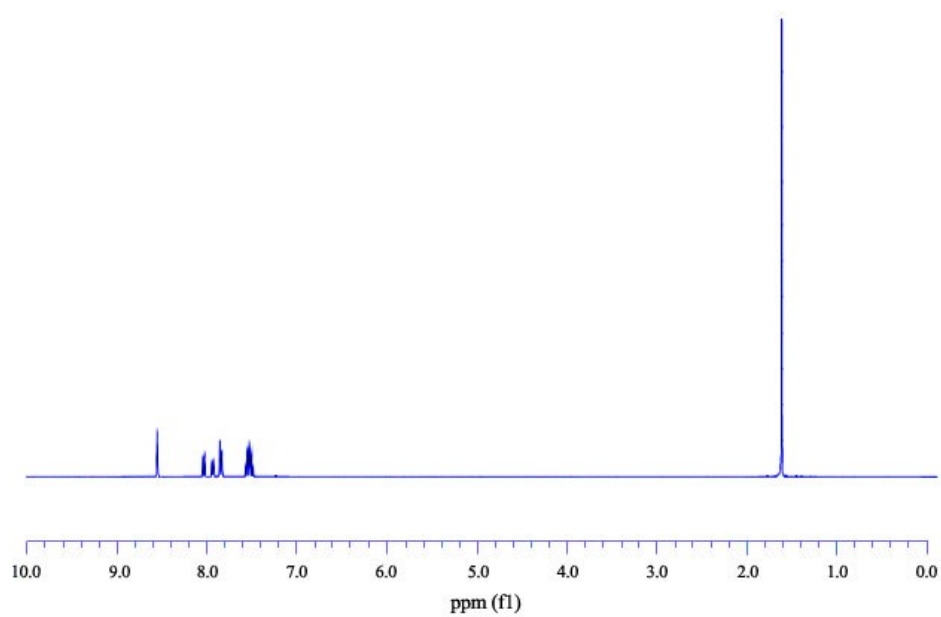

Table 4, entry 13

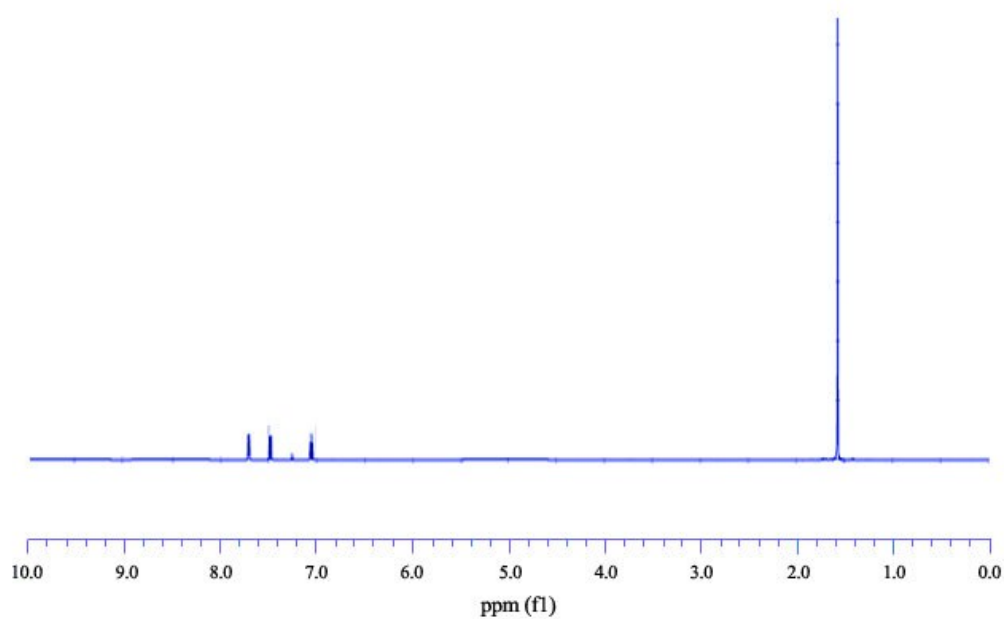

Table 3, entry 1

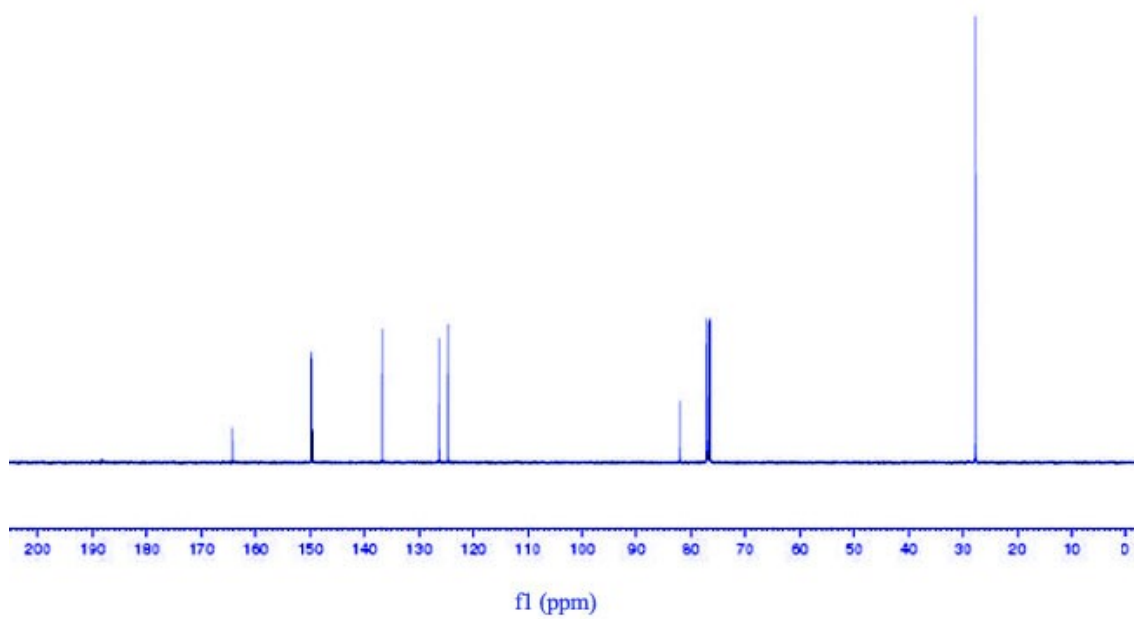

Table 3, entry 2

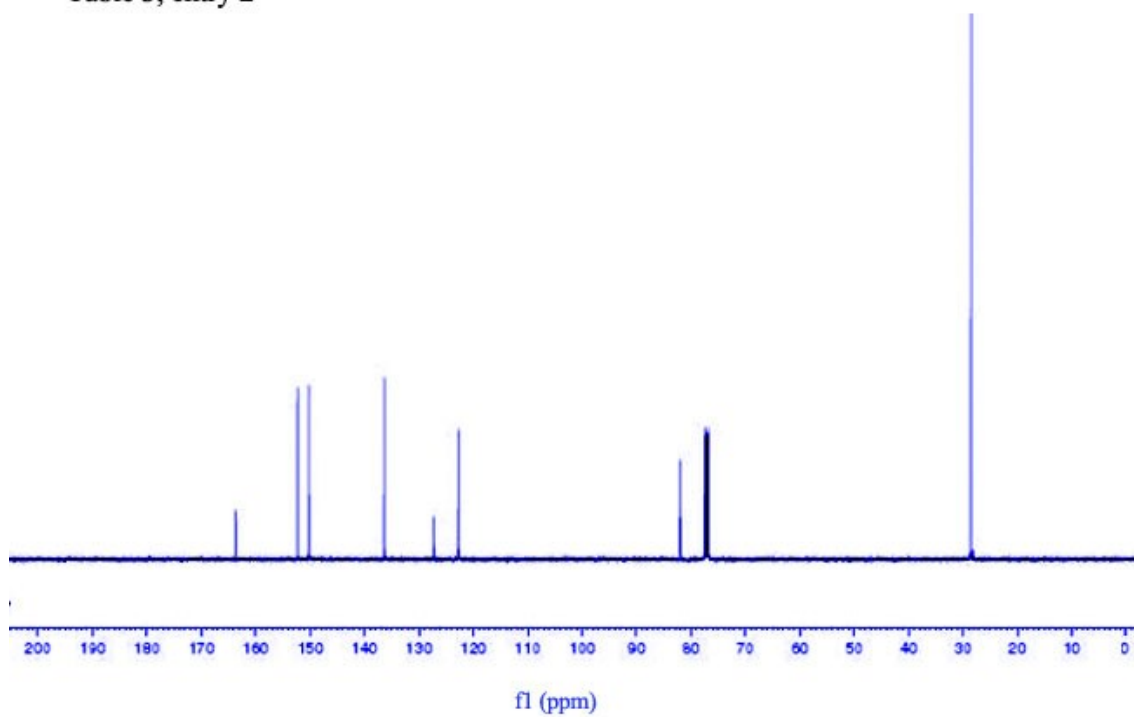

Table 3, entry 3

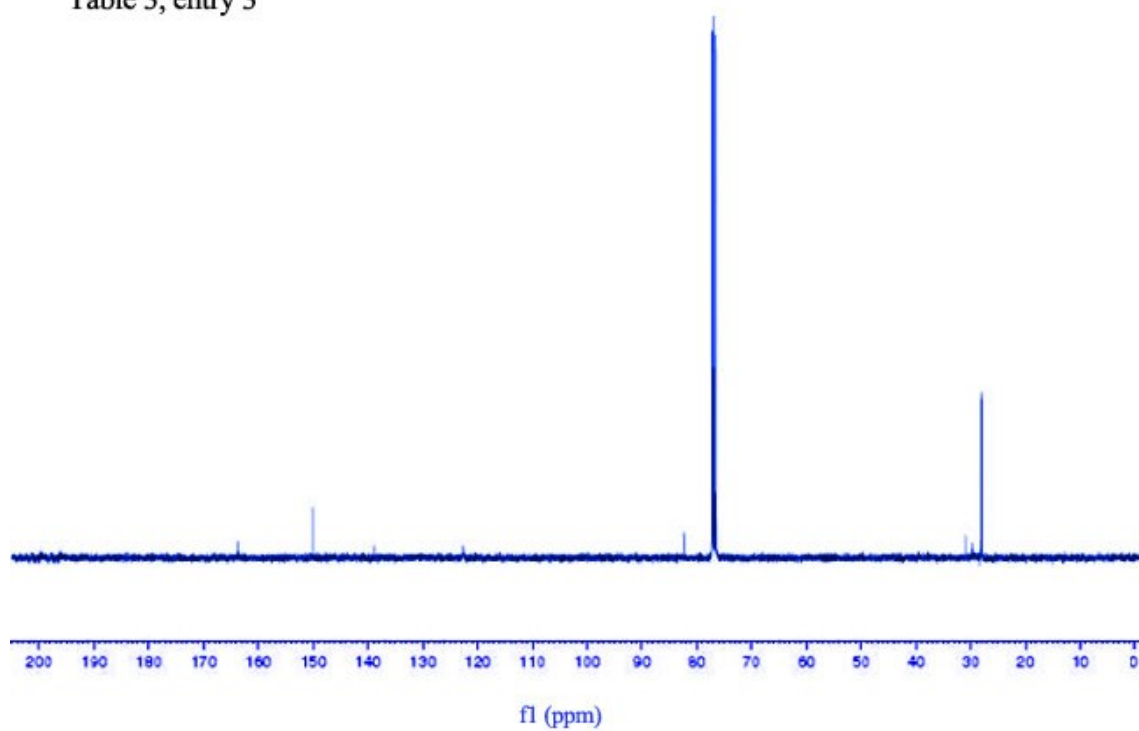

Table 3, entry 4

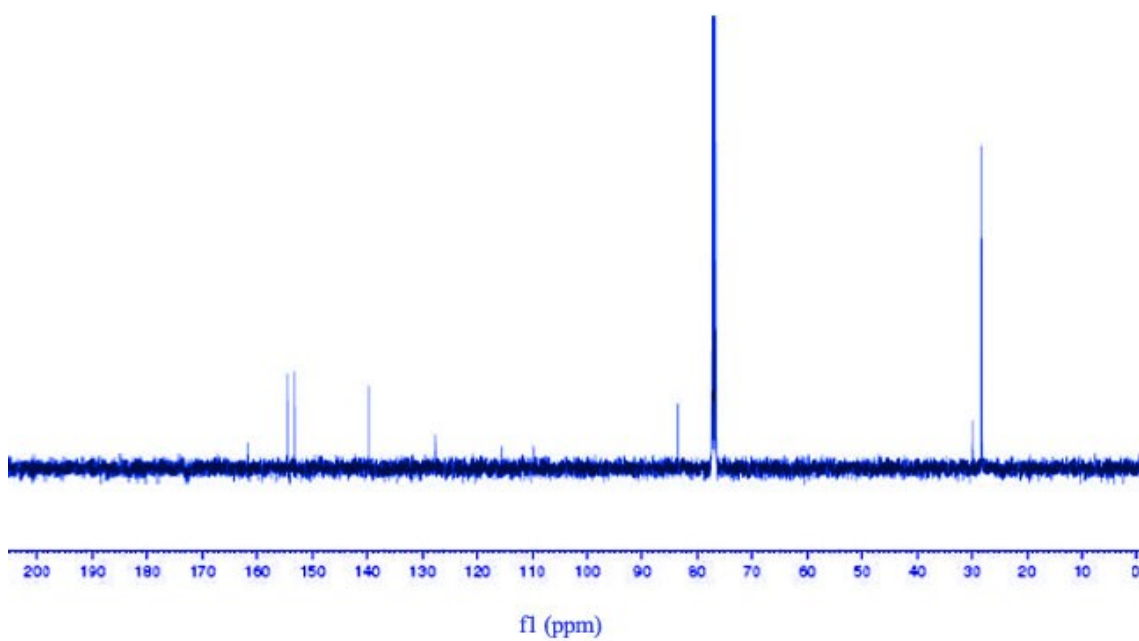

Table 3, entry 5

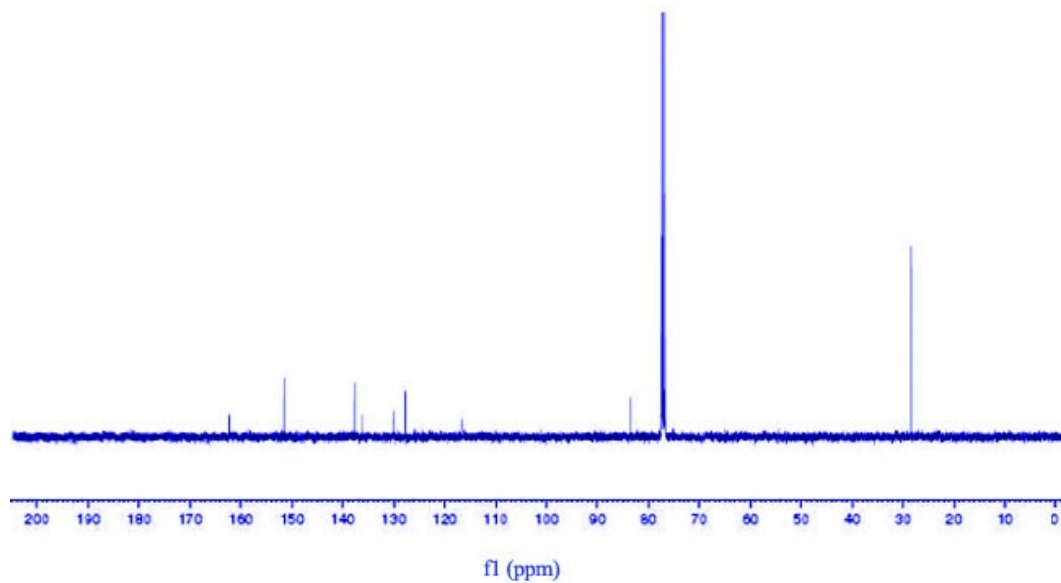

Table 3, entry 6

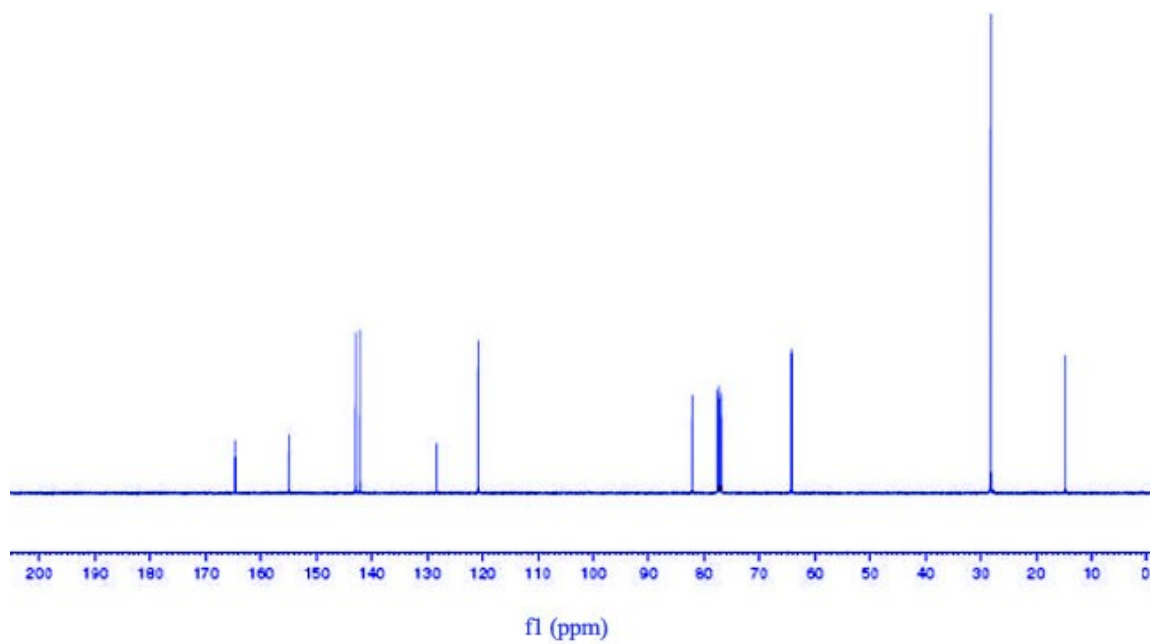

Table 3, entry 7

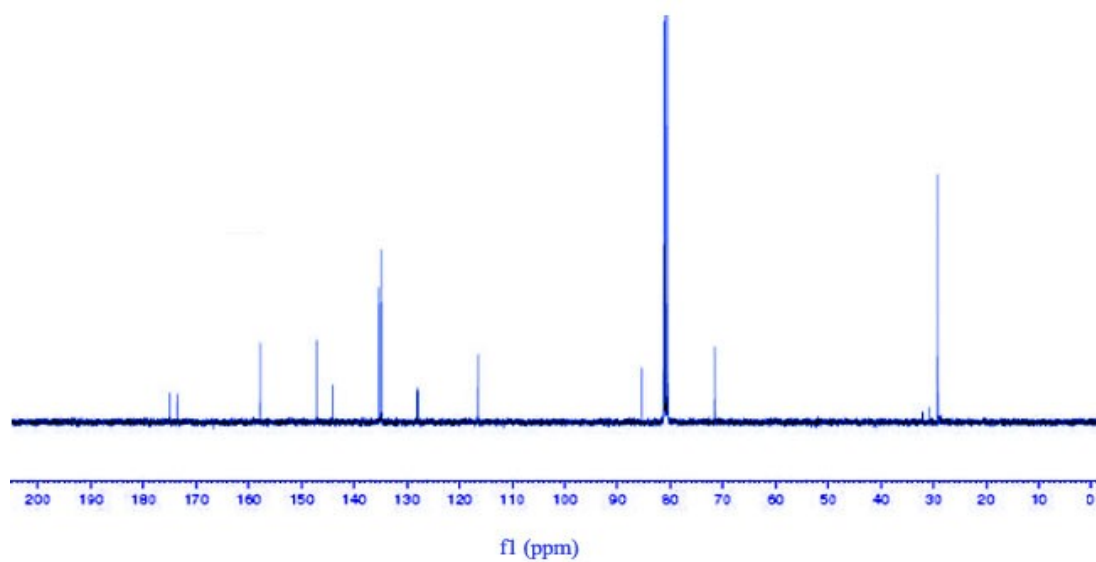

Table 3, entry 8

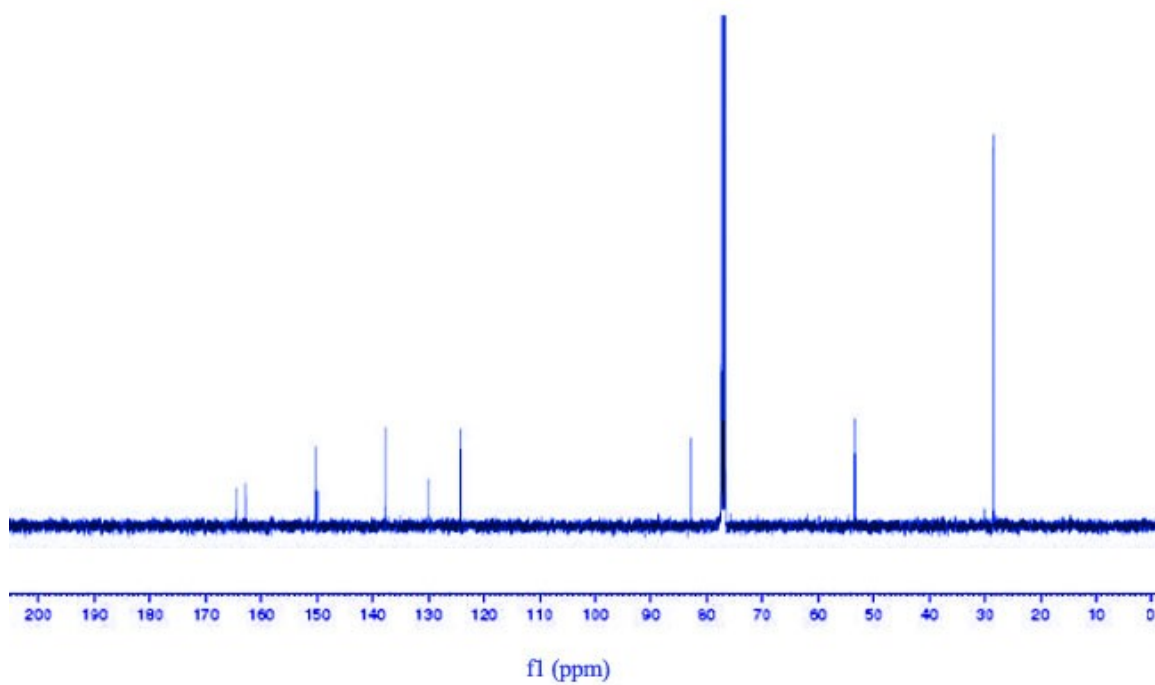

Table 3, entry 9

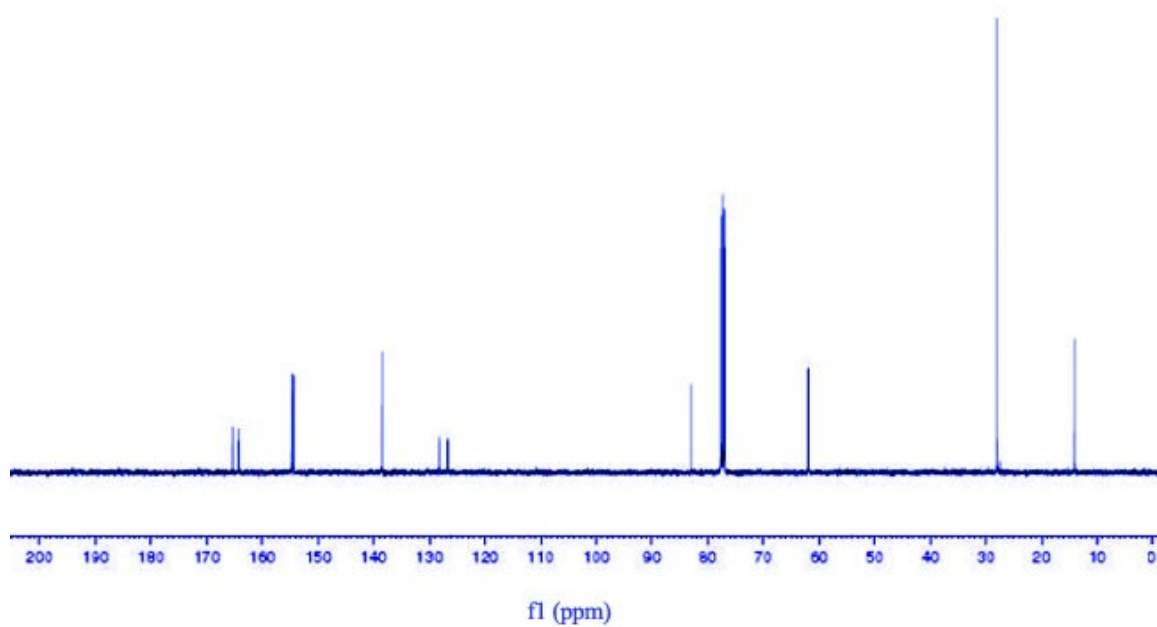

Table 3, entry 10

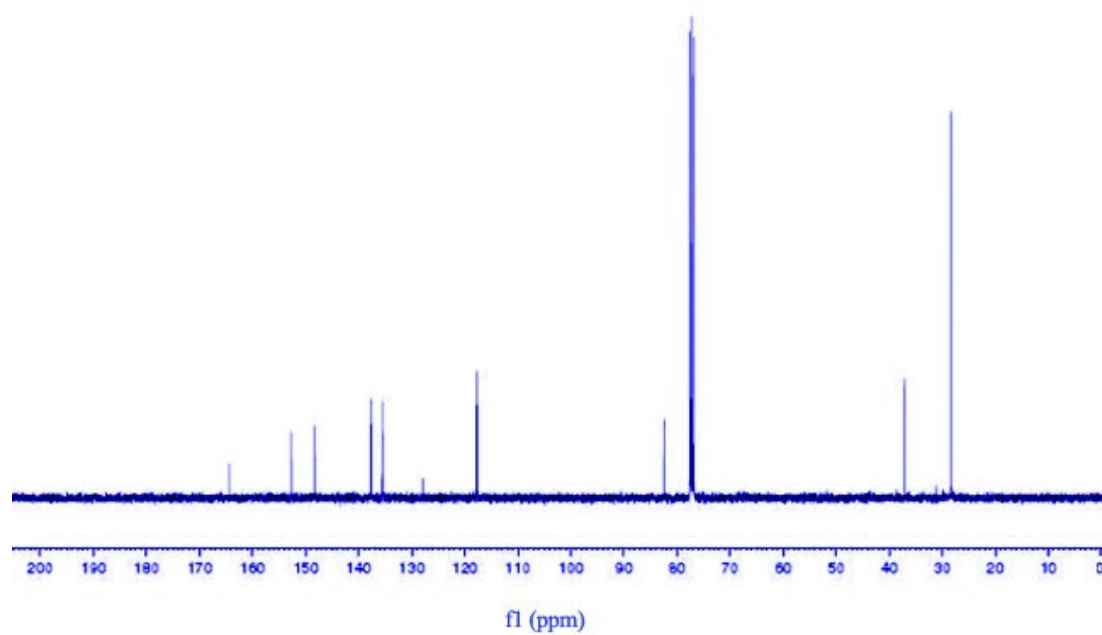



Table 3, entry 11

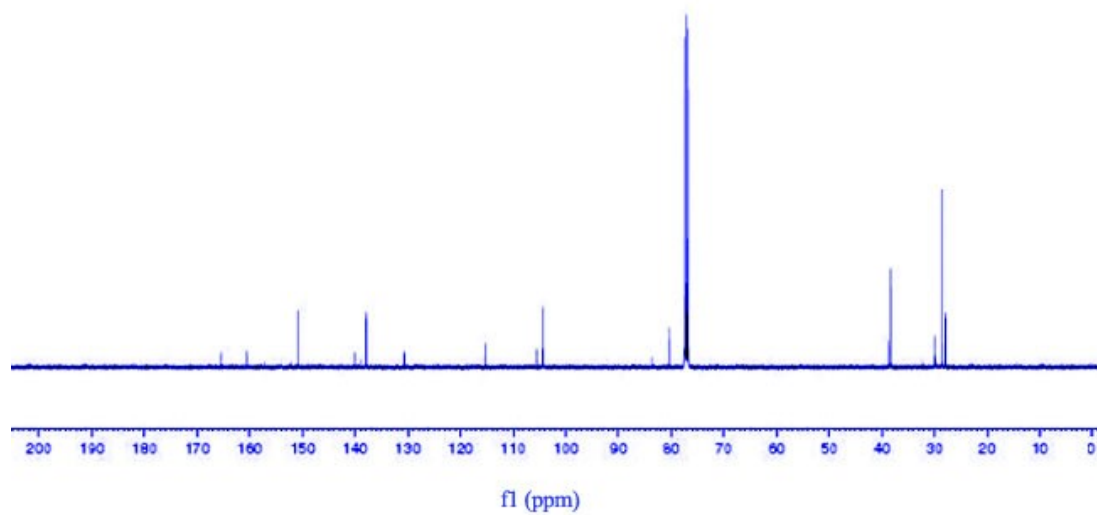

Table 3, entry 12

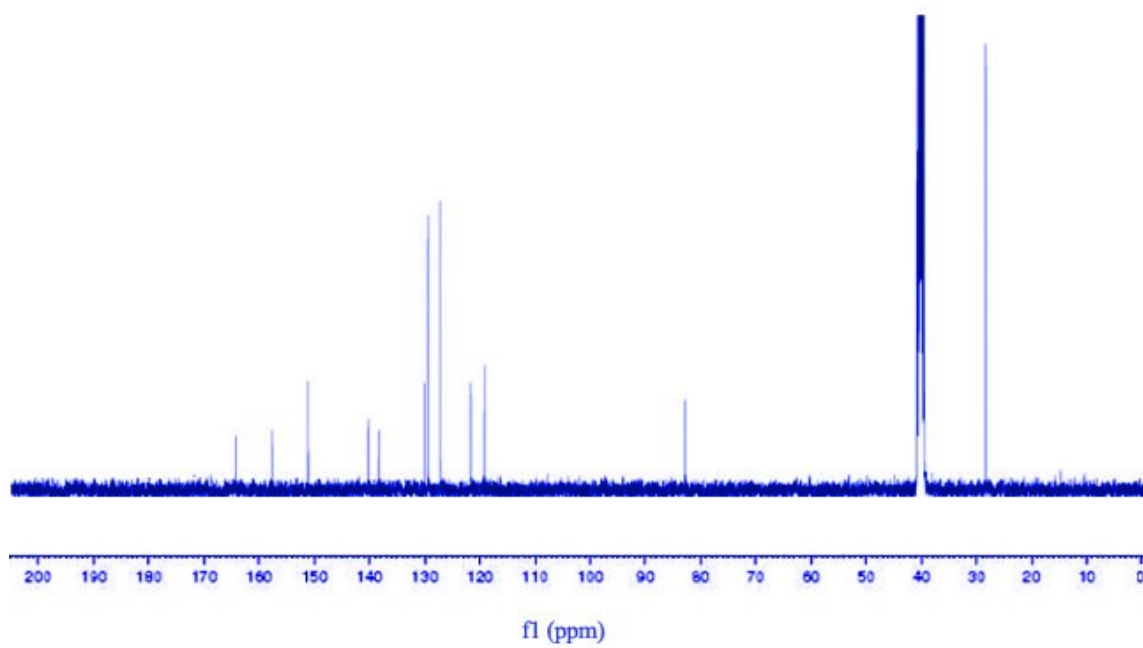

Table 3, entry 13

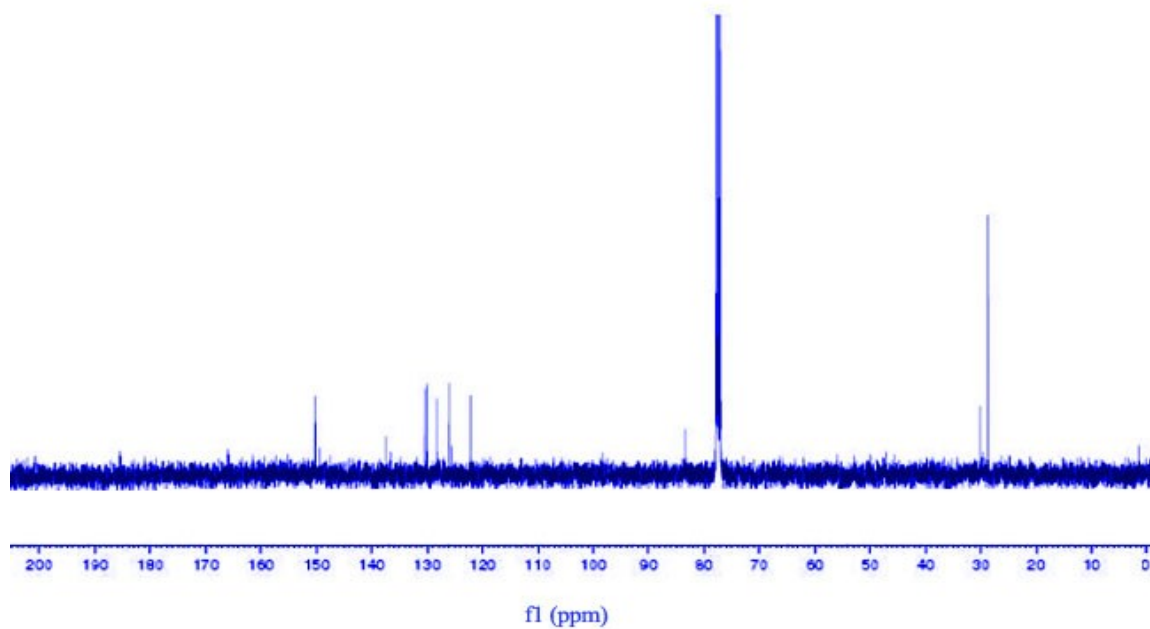

Table 3, entry 14

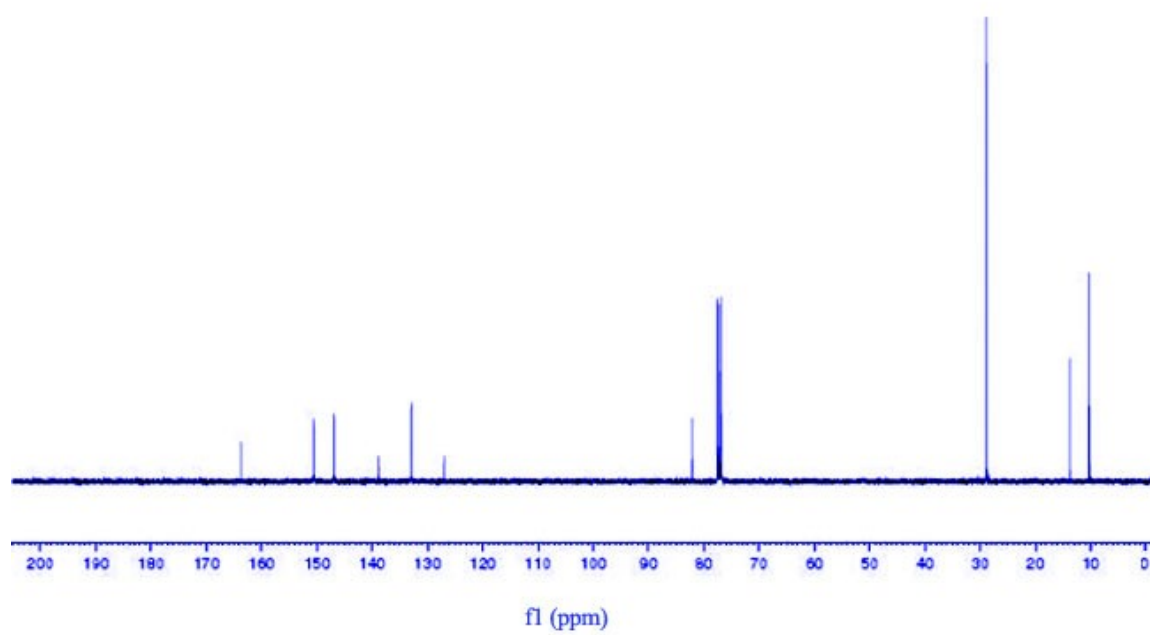

Table 3, entry 15

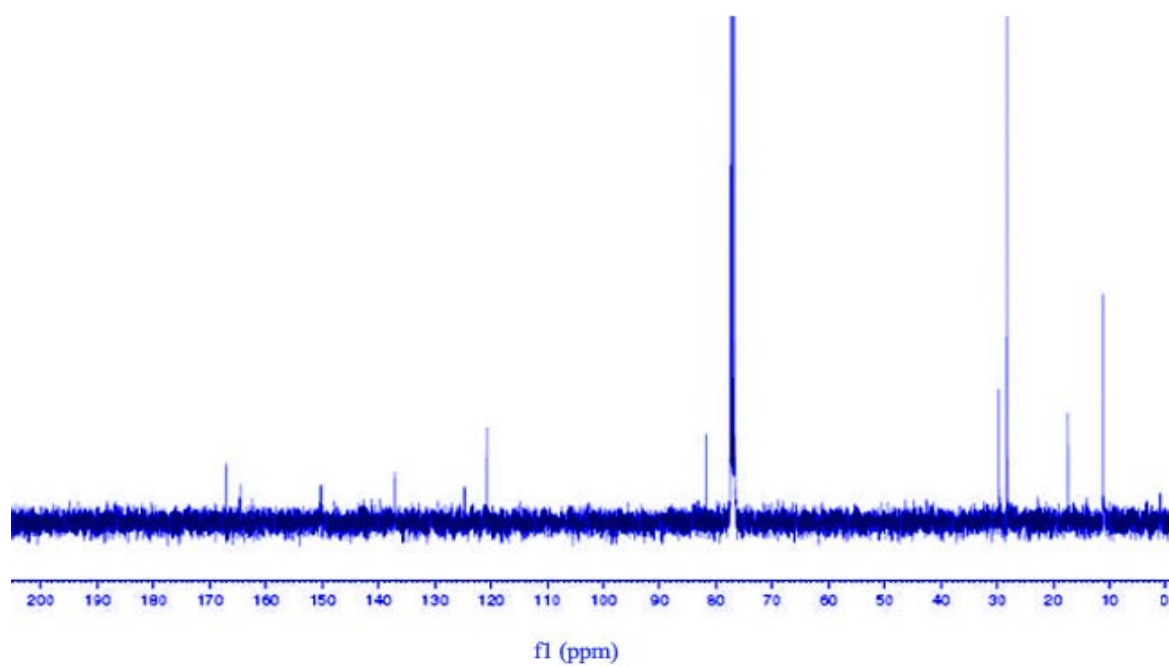

Table 4, entry 1

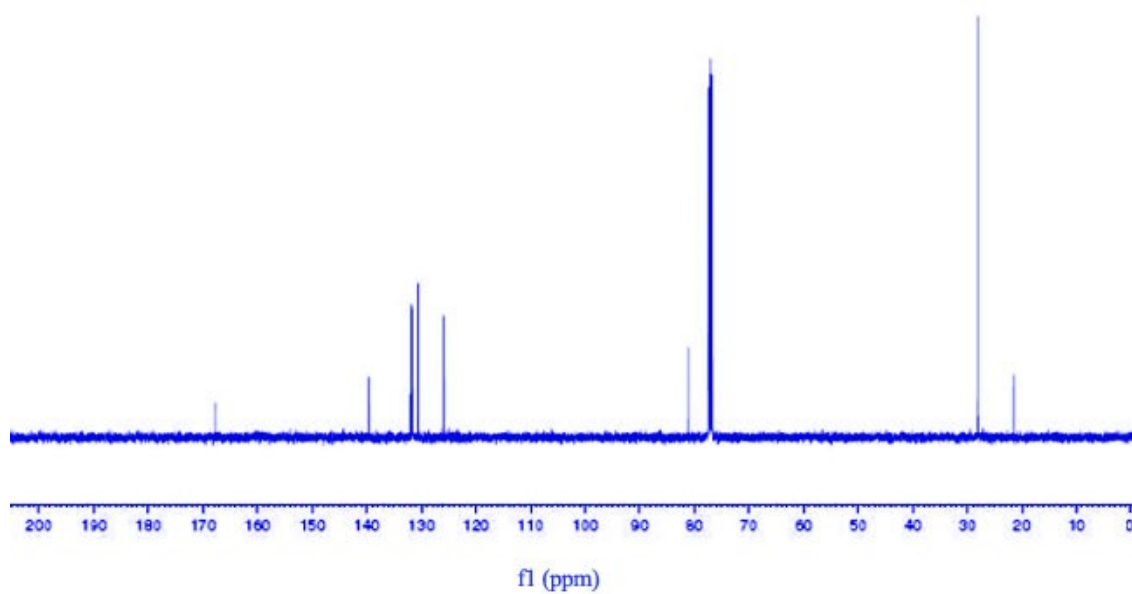

Table 4, entry 2

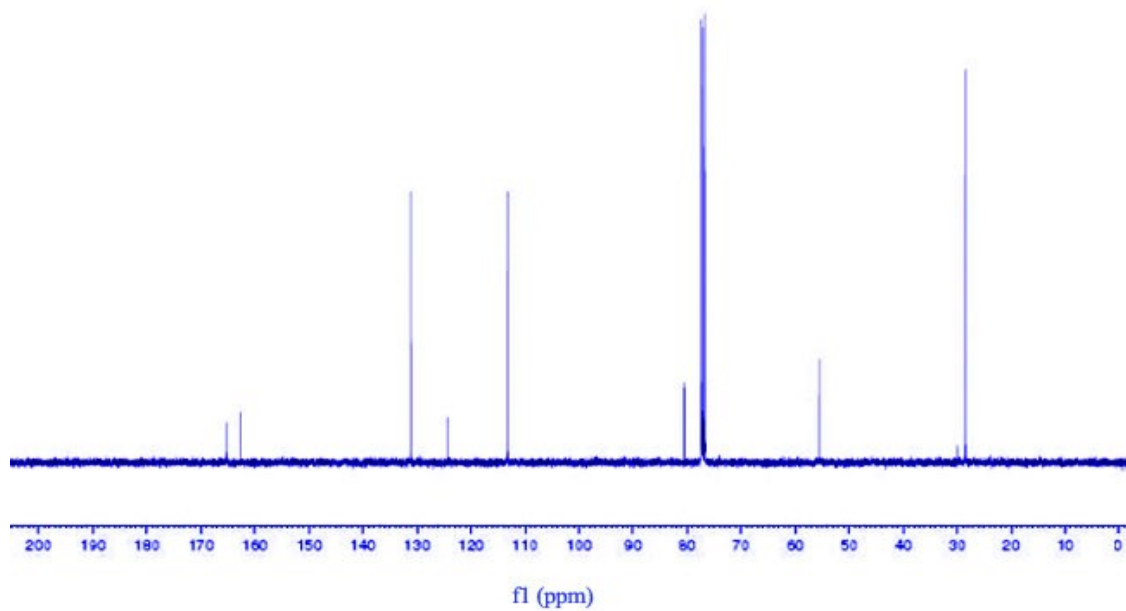

Table 4, entry 3

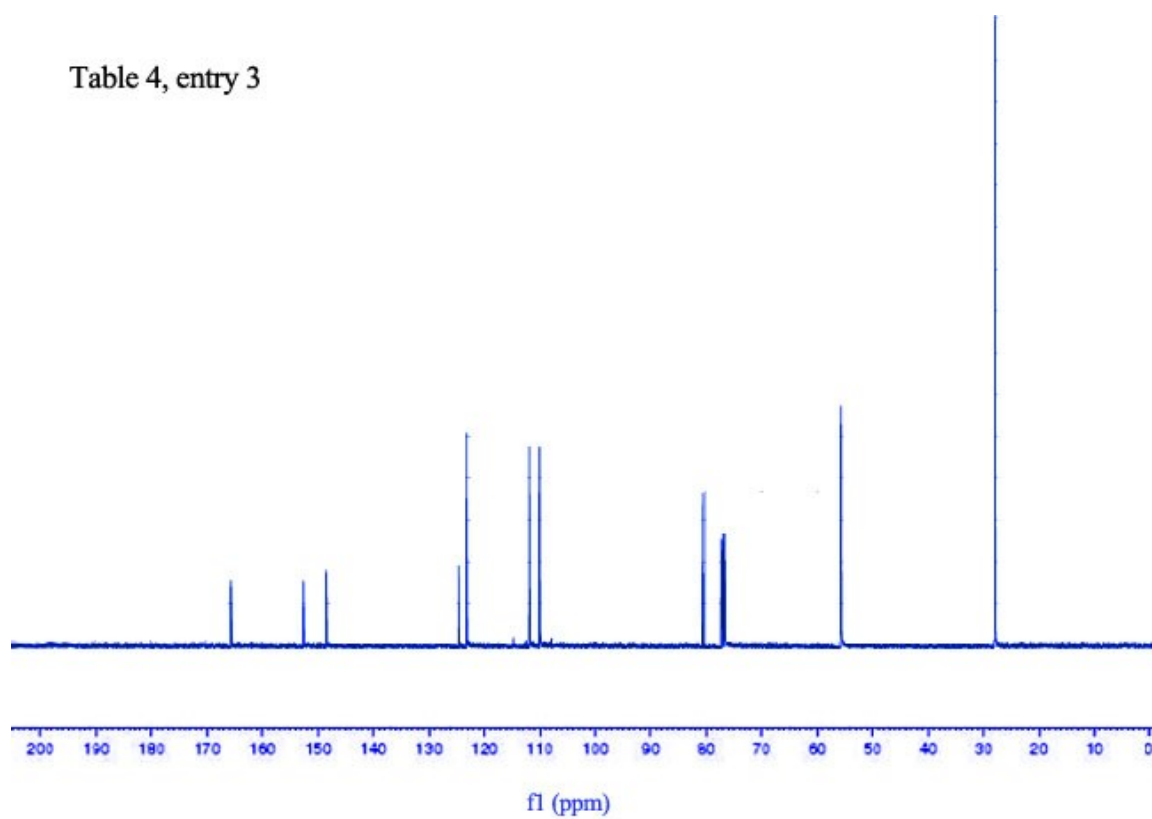

Table 4, entry 4

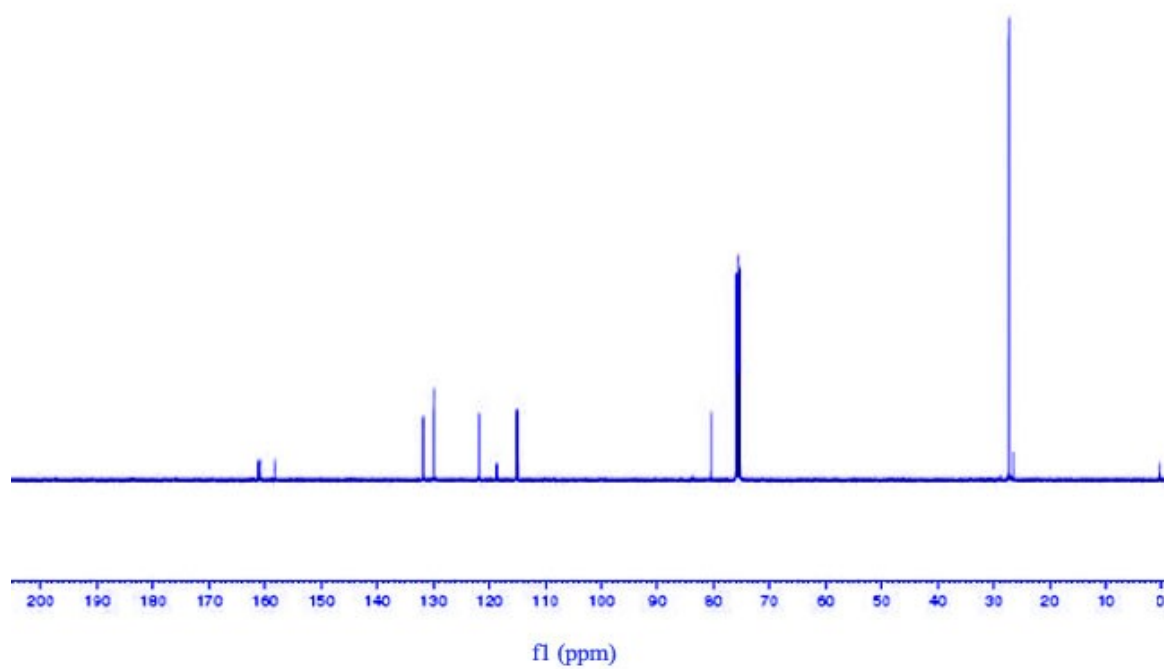

Table 4, entry 5

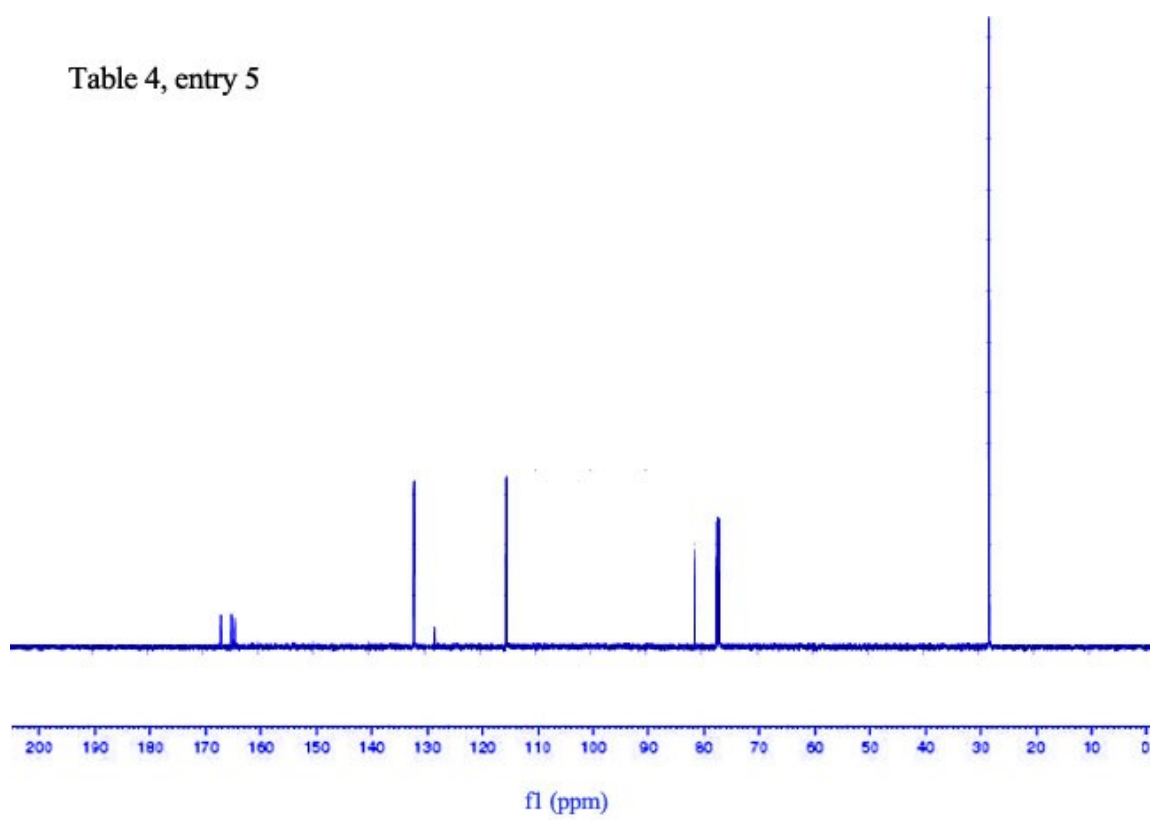

Table 4, entry 6

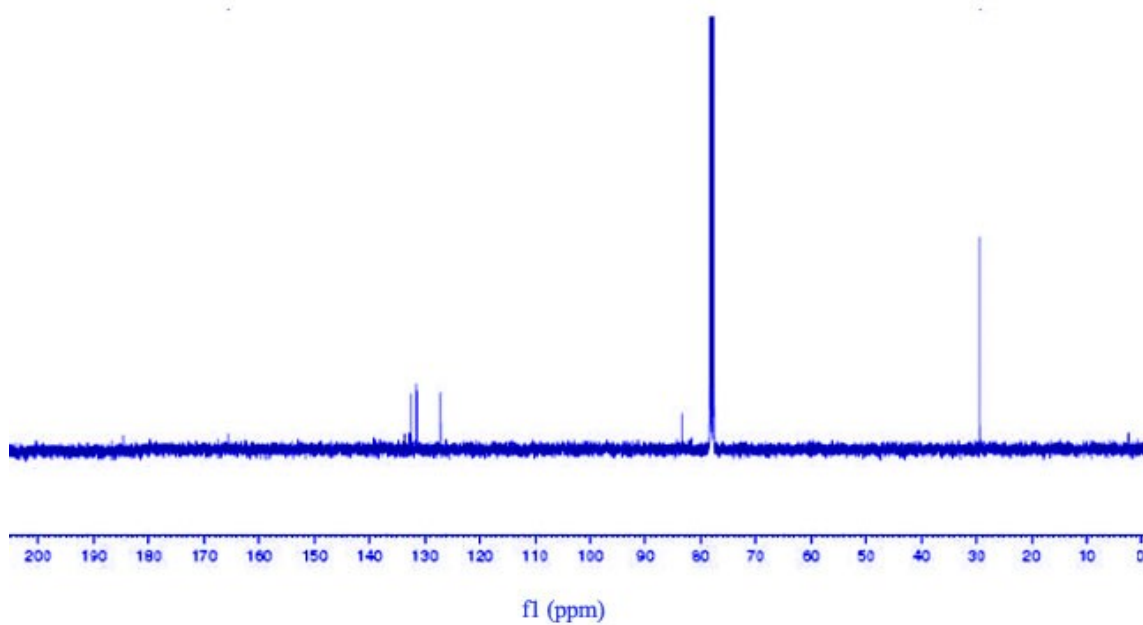

Table 4, entry 7

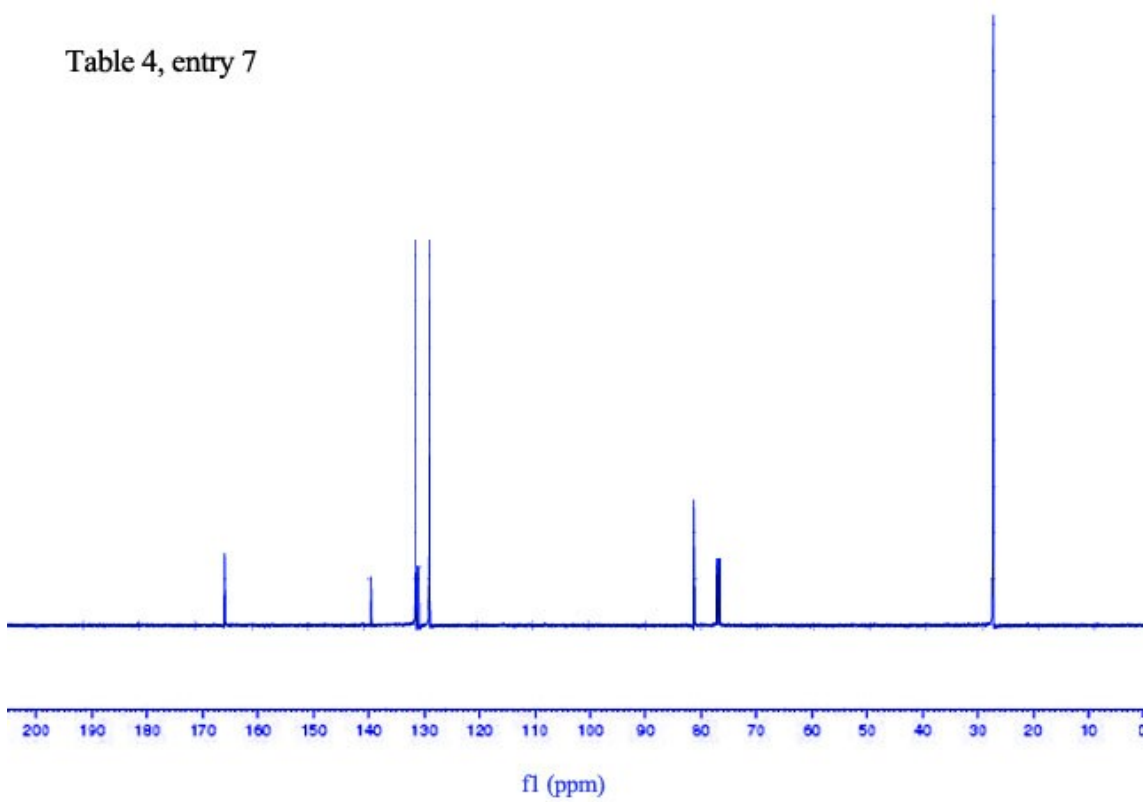

Table 4, entry 8

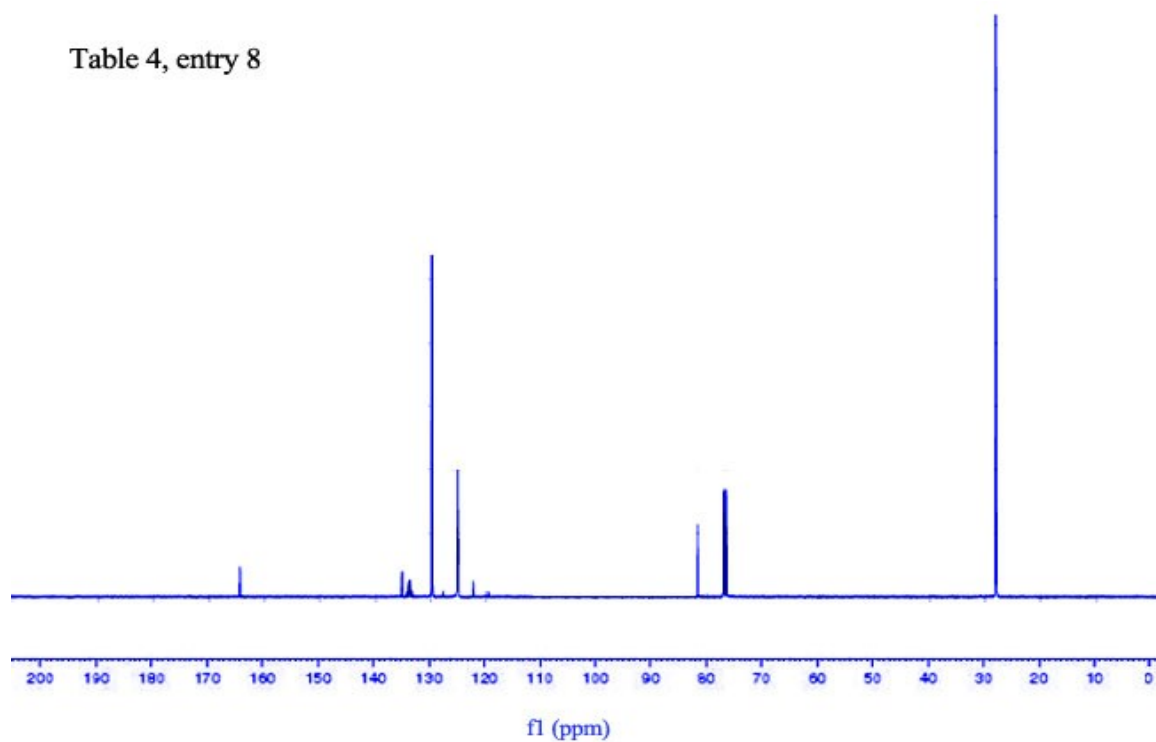

Table 4, entry 9

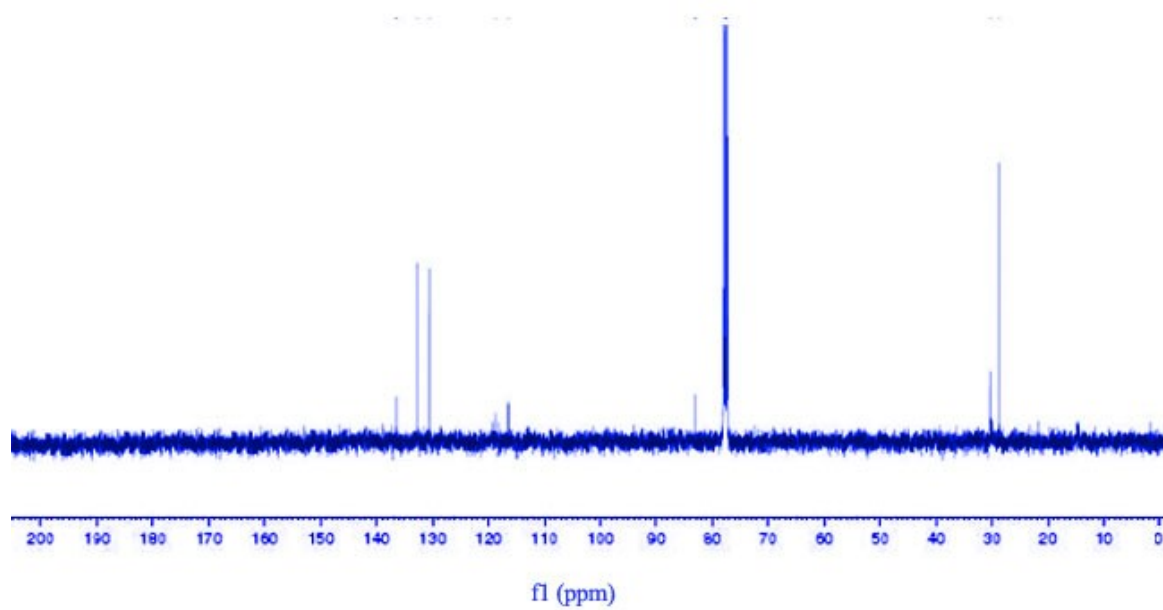

Table 4, entry 10

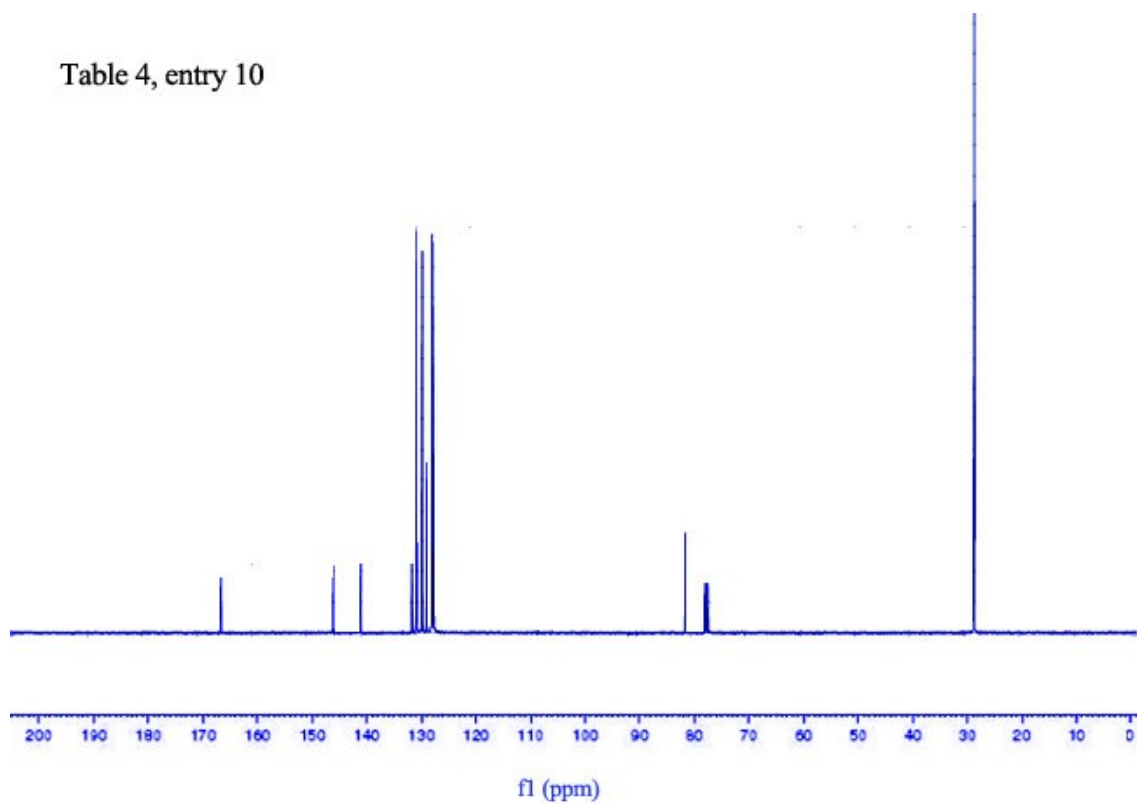

Table 4, entry 11

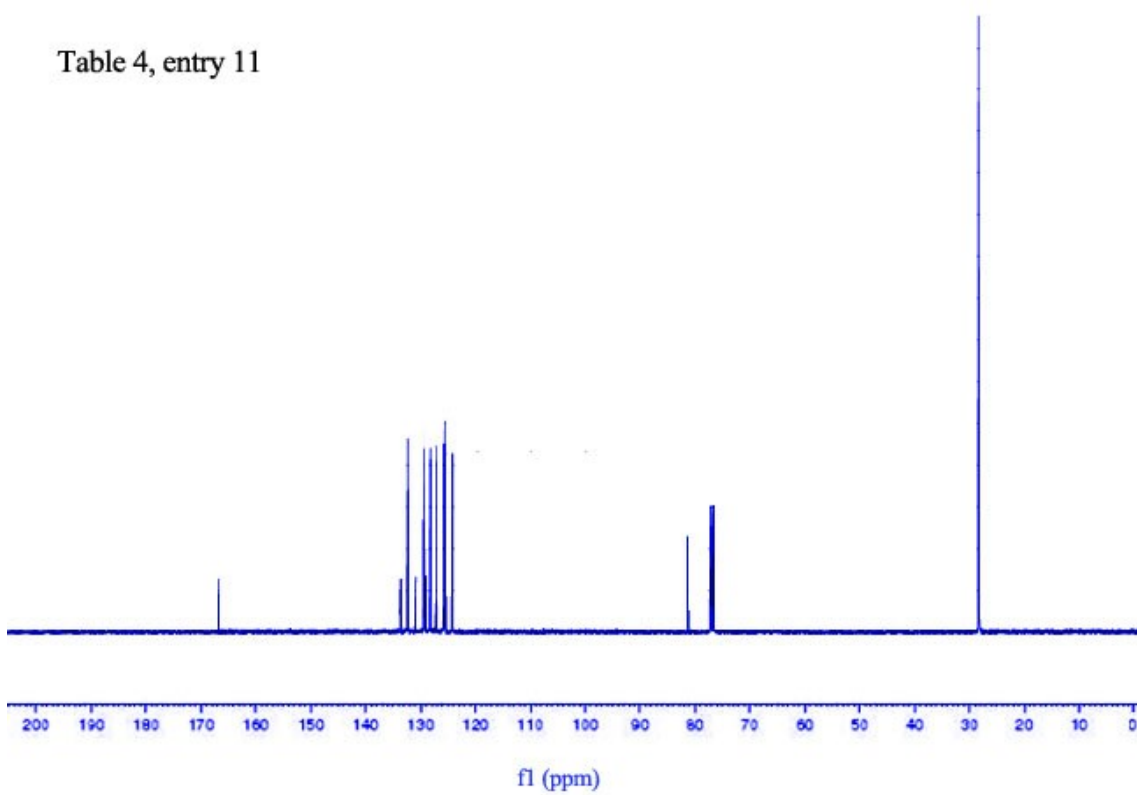



Table 4, entry 12

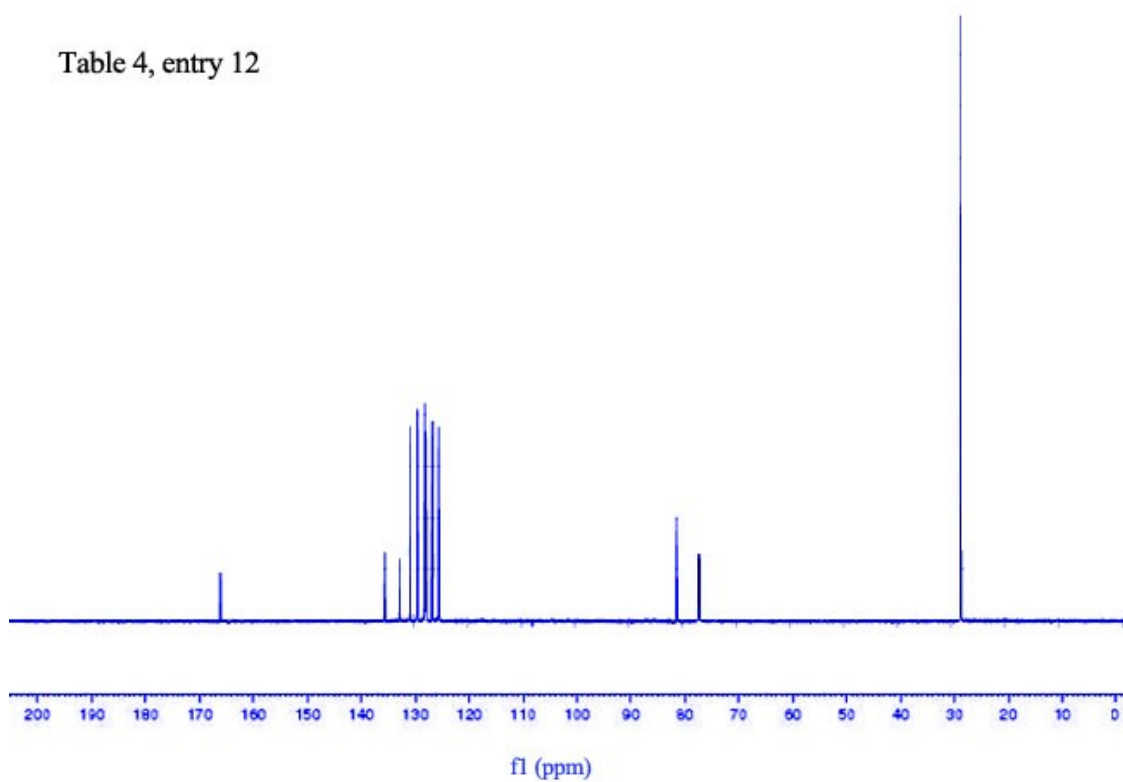

Table 4, entry 13

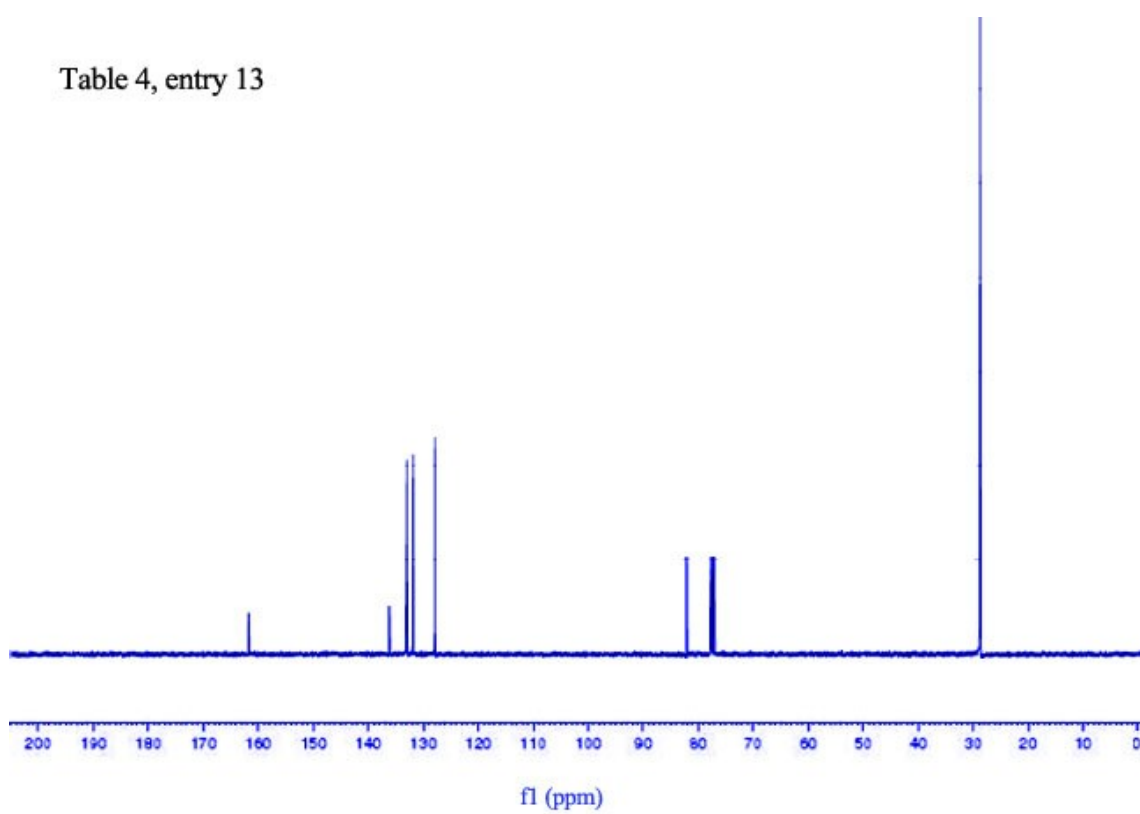

Supplement: c4gc02443e1.pdf [file c4gc02443e1.pdf]
